# Supplementary material for: Glycoproteomic Analysis of the Secretome of Human Endothelial Cells
Source: PubMed Central journal article supplement — Mol Cell Proteomics. 2013 Jan 23;12(4):956–78. doi: 10.1074/mcp.M112.024018 (PMC3617342; doi:10.1074/mcp.m112.024018), 2013-01-23
Supplement: supp_M112.024018_mcp.M112.024018-3.pdf [file supp_M112.024018_mcp.M112.024018-3.pdf]

**Supplemental Table 3. Protein identifications for the DIGE comparison of cellular and secreted proteins of HUVECs.**

| No. | Protein names                                                         | UniProt ID  | Protein identification probability | Number of total spectra | Sequence coverage | Theoretical |         |
|-----|-----------------------------------------------------------------------|-------------|------------------------------------|-------------------------|-------------------|-------------|---------|
|     |                                                                       |             |                                    |                         |                   | pI          | Mw (Da) |
| 1   | Unidentified                                                          | -           | -                                  | -                       | -                 | -           | -       |
| 2   | Protein S100-A6                                                       | S10A6_HUMAN | 99.9%                              | 5                       | 16.70%            | 5.32        | 10,180  |
| 3   | Unidentified                                                          | -           | -                                  | -                       | -                 | -           | -       |
| 4   | Unidentified                                                          | -           | -                                  | -                       | -                 | -           | -       |
| 5   | Beta-2-microglobulin [Cleaved into: Beta-2-microglobulin form pI 5.3] | B2MG_HUMAN  | 99.8%                              | 2                       | 16.80%            | 6.07        | 11,731  |
| 6   | Protein S100-A10                                                      | S10AA_HUMAN | 99.2%                              | 2                       | 10.30%            | 7.30        | 11,072  |
| 7   | Signal recognition particle 9 kDa protein                             | SRP09_HUMAN | 98.0%                              | 1                       | 12.80%            | 8.28        | 9,981   |
| 8   | 10 kDa heat shock protein, mitochondrial                              | CH10_HUMAN  | 99.7%                              | 2                       | 9.80%             | 8.91        | 10,801  |
| 9   | SH3 domain-binding glutamic acid-rich-like protein 3                  | SH3L3_HUMAN | 100.0%                             | 3                       | 26.90%            | 4.82        | 10,438  |
| 10  | Myotrophin                                                            | MTPN_HUMAN  | 99.0%                              | 2                       | 14.40%            | 5.28        | 12,764  |
| 11  | Thioredoxin                                                           | THIO_HUMAN  | 99.8%                              | 2                       | 21.00%            | 4.82        | 11,606  |
| 12  | Galectin-1                                                            | LEG1_HUMAN  | 100.0%                             | 12                      | 40.00%            | 5.30        | 14,585  |
| 13  | Cystatin-B                                                            | CYTB_HUMAN  | 72.1%                              | 2                       | 12.20%            | 6.96        | 11,140  |
| 14  | Macrophage migration inhibitory factor                                | MIF_HUMAN   | 99.3%                              | 2                       | 9.57%             | 8.24        | 12,345  |
| 15  | Profilin-1                                                            | PROF1_HUMAN | 100.0%                             | 6                       | 28.60%            | 8.47        | 14,923  |
| 16  | Peptidyl-prolyl cis-trans isomerase FKBP1A                            | FKB1A_HUMAN | 100.0%                             | 13                      | 41.70%            | 8.08        | 11,820  |
| 17  | Profilin-1                                                            | PROF1_HUMAN | 100.0%                             | 18                      | 57.10%            | 8.47        | 14,923  |
| 18  | Small nuclear ribonucleoprotein Sm D2                                 | SMD2_HUMAN  | 100.0%                             | 3                       | 16.90%            | 9.92        | 13,396  |
| 19  | Histidine triad nucleotide-binding protein 1                          | HINT1_HUMAN | 98.8%                              | 1                       | 7.14%             | 6.46        | 13,671  |
| 20  | 40S ribosomal protein S12                                             | RS12_HUMAN  | 100.0%                             | 5                       | 20.50%            | 7.01        | 14,384  |
| 21  | Fatty acid-binding protein, epidermal                                 | FABP5_HUMAN | 100.0%                             | 4                       | 26.70%            | 6.82        | 15,033  |
| 22  | Tubulin-specific chaperone A                                          | TBCA_HUMAN  | 100.0%                             | 7                       | 27.80%            | 5.25        | 12,724  |
| 23  | Myosin light polypeptide 6                                            | MYL6_HUMAN  | 100.0%                             | 10                      | 26.50%            | 4.56        | 16,799  |

|    |                                                            |             |        |    |        |      |        |
|----|------------------------------------------------------------|-------------|--------|----|--------|------|--------|
| 24 | Myosin light polypeptide 6                                 | MYL6_HUMAN  | 100.0% | 8  | 32.50% | 4.56 | 16,799 |
| 25 | Calmodulin                                                 | CALM_HUMAN  | 93.1%  | 4  | 7.38%  | 4.09 | 16,706 |
| 26 | Unidentified                                               | -           | -      | -  | -      | -    | -      |
| 27 | Myosin regulatory light chain 12A                          | ML12A_HUMAN | 100.0% | 7  | 24.00% | 4.65 | 19,663 |
| 28 | Eukaryotic translation initiation factor 5A-1              | IF5A1_HUMAN | 100.0% | 9  | 27.30% | 5.08 | 16,701 |
| 29 | Actin-related protein 2/3 complex subunit 5                | ARPC5_HUMAN | 100.0% | 5  | 15.20% | 5.47 | 16,189 |
| 30 | Stathmin                                                   | STMN1_HUMAN | 100.0% | 5  | 26.80% | 5.76 | 17,171 |
| 31 | Peptidyl-prolyl cis-trans isomerase A                      | PPIA_HUMAN  | 100.0% | 8  | 32.10% | 7.82 | 17,881 |
| 32 | Peptidyl-prolyl cis-trans isomerase A                      | PPIA_HUMAN  | 100.0% | 20 | 63.60% | 7.82 | 17,881 |
| 33 | Nucleoside diphosphate kinase B                            | NDKB_HUMAN  | 100.0% | 17 | 44.10% | 8.55 | 17,167 |
| 34 | Cofilin-1                                                  | COF1_HUMAN  | 100.0% | 14 | 40.40% | 8.26 | 18,371 |
| 35 | Cofilin-1                                                  | COF1_HUMAN  | 100.0% | 4  | 8.43%  | 8.26 | 18,371 |
| 36 | NEDD8-conjugating enzyme Ubc12                             | UBC12_HUMAN | 99.8%  | 3  | 9.84%  | 7.57 | 20,900 |
| 37 | Cofilin-1                                                  | COF1_HUMAN  | 100.0% | 8  | 15.10% | 8.26 | 18,371 |
| 38 | Nucleoside diphosphate kinase A                            | NDKA_HUMAN  | 100.0% | 7  | 26.30% | 5.82 | 17,018 |
| 39 | Superoxide dismutase [Cu-Zn]                               | SODC_HUMAN  | 99.8%  | 2  | 16.90% | 5.70 | 15,805 |
| 40 | Eukaryotic translation initiation factor 1A, X-chromosomal | IF1AX_HUMAN | 100.0% | 1  | 7.64%  | 5.07 | 16,329 |
| 41 | Prostaglandin E synthase 3                                 | TEBP_HUMAN  | 100.0% | 4  | 6.25%  | 4.32 | 18,697 |
| 42 | Proteasome subunit beta type-6                             | PSB6_HUMAN  | 100.0% | 6  | 2.84%  | 4.91 | 21,904 |
| 43 | UMP-CMP kinase                                             | KCY_HUMAN   | 99.8%  | 4  | 11.20% | 5.44 | 22,222 |
| 43 | Peroxiredoxin-2                                            | PRDX2_HUMAN | 99.8%  | 3  | 14.10% | 5.67 | 21,761 |
| 44 | Phosphatidylethanolamine-binding protein 1                 | PEBP1_HUMAN | 100.0% | 4  | 23.00% | 7.43 | 20,926 |
| 45 | Transgelin-2                                               | TAGL2_HUMAN | 100.0% | 11 | 43.20% | 8.45 | 22,260 |
| 46 | Peroxiredoxin-1                                            | PRDX1_HUMAN | 100.0% | 17 | 50.30% | 8.27 | 22,110 |
| 47 | Peroxiredoxin-1                                            | PRDX1_HUMAN | 100.0% | 5  | 14.60% | 8.27 | 22,110 |
| 48 | Protein DJ-1                                               | PARK7_HUMAN | 99.7%  | 2  | 6.88%  | 6.32 | 19,891 |
| 49 | Glutathione S-transferase P                                | GSTP1_HUMAN | 100.0% | 8  | 32.40% | 5.44 | 23,225 |

|    |                                                               |             |        |    |        |      |         |
|----|---------------------------------------------------------------|-------------|--------|----|--------|------|---------|
| 50 | Ubiquitin carboxyl-terminal hydrolase isozyme L1              | UCHL1_HUMAN | 100.0% | 10 | 25.10% | 5.22 | 24,554  |
| 51 | Annexin A2                                                    | ANXA2_HUMAN | 100.0% | 5  | 8.85%  | 7.56 | 38,473  |
| 52 | Translationally-controlled tumor protein                      | TCTP_HUMAN  | 100.0% | 9  | 27.90% | 4.84 | 19,595  |
| 53 | Acidic leucine-rich nuclear phosphoprotein 32 family member A | AN32A_HUMAN | 99.7%  | 3  | 6.02%  | 3.98 | 28,585  |
| 54 | Elongation factor 1-beta                                      | EF1B_HUMAN  | 100.0% | 6  | 20.40% | 4.50 | 24,633  |
| 55 | Tropomyosin alpha-3 chain                                     | TPM3_HUMAN  | 100.0% | 26 | 35.50% | 4.68 | 32,819  |
| 56 | Rho GDP-dissociation inhibitor 1                              | GDIR1_HUMAN | 100.0% | 8  | 21.10% | 5.01 | 23,076  |
| 57 | Rho GDP-dissociation inhibitor 2                              | GDIR2_HUMAN | 100.0% | 6  | 35.80% | 5.08 | 22,857  |
| 58 | Ran-specific GTPase-activating protein                        | RANG_HUMAN  | 99.8%  | 3  | 9.71%  | 5.19 | 23,179  |
| 59 | Heat shock protein beta-1                                     | HSPB1_HUMAN | 100.0% | 9  | 38.00% | 5.98 | 22,783  |
| 60 | Triosephosphate isomerase                                     | TPIS_HUMAN  | 99.8%  | 4  | 10.00% | 5.65 | 30,791  |
| 61 | Triosephosphate isomerase                                     | TPIS_HUMAN  | 100.0% | 20 | 43.00% | 5.65 | 30,791  |
| 62 | Calcyclin-binding protein                                     | CYBP_HUMAN  | 100.0% | 6  | 8.70%  | 8.32 | 26,079  |
| 63 | Phosphoglycerate mutase 1                                     | PGAM1_HUMAN | 100.0% | 4  | 12.60% | 6.75 | 28,673  |
| 64 | Guanine nucleotide-binding protein subunit beta-2-like 1      | GBLP_HUMAN  | 100.0% | 8  | 14.20% | 7.57 | 34,946  |
| 65 | F-actin-capping protein subunit beta                          | CAPZB_HUMAN | 100.0% | 8  | 18.75% | 5.36 | 31,219  |
| 66 | Neutral alpha-glucosidase AB                                  | GANAB_HUMAN | 99.9%  | 1  | 1.59%  | 5.58 | 103,975 |
| 67 | Elongation factor 1-delta                                     | EF1D_HUMAN  | 100.0% | 7  | 22.40% | 4.90 | 30,991  |
| 68 | Elongation factor 1-delta                                     | EF1D_HUMAN  | 99.8%  | 4  | 9.61%  | 4.90 | 30,991  |
| 69 | Charged multivesicular body protein 4b                        | CHM4B_HUMAN | 100.0% | 6  | 15.20% | 4.76 | 24,819  |
| 70 | Protein SET                                                   | SET_HUMAN   | 99.8%  | 3  | 6.90%  | 4.22 | 33,358  |
| 71 | Alpha-2-HS-glycoprotein                                       | FETUA_BOVIN | 100.0% | 2  | 7.52%  | 5.10 | 36,353  |
| 72 | Actin, cytoplasmic 1                                          | ACTB_HUMAN  | 100.0% | 29 | 32.00% | 5.29 | 41,737  |
| 73 | Heterogeneous nuclear ribonucleoprotein A1                    | ROA1_HUMAN  | 100.0% | 6  | 17.20% | 9.17 | 38,615  |
| 74 | Glyceraldehyde-3-phosphate dehydrogenase                      | G3P_HUMAN   | 100.0% | 14 | 21.20% | 8.58 | 35,922  |
| 75 | Fructose-bisphosphate aldolase A                              | ALDOA_HUMAN | 100.0% | 9  | 22.80% | 8.39 | 39,289  |
| 76 | Phosphoglycerate kinase 1                                     | PGK1_HUMAN  | 100.0% | 7  | 11.00% | 8.30 | 44,483  |

|    |                                           |                          |        |    |        |      |        |
|----|-------------------------------------------|--------------------------|--------|----|--------|------|--------|
| 77 | Obg-like ATPase 1                         | OLA1_HUMAN               | 100.0% | 6  | 7.58%  | 7.64 | 44,744 |
| 78 | Phosphoglycerate kinase 1                 | PGK1_HUMAN               | 100.0% | 6  | 9.11%  | 8.30 | 44,483 |
| 79 | Plasminogen activator inhibitor 1         | PAI1_HUMAN               | 100.0% | 3  | 4.48%  | 6.97 | 42,769 |
| 80 | Plasminogen activator inhibitor 1         | PAI1_HUMAN               | 100.0% | 6  | 8.46%  | 6.97 | 42,769 |
| 81 | Alpha-enolase                             | ENOA_HUMAN               | 100.0% | 26 | 41.50% | 6.99 | 47,038 |
| 82 | Elongation factor 1-alpha 1               | EF1A1_HUMAN              | 100.0% | 11 | 14.90% | 9.10 | 50,141 |
| 83 | Interstitial collagenase                  | MMP1_HUMAN               | 100.0% | 17 | 16.20% | 6.17 | 42,635 |
| 84 | Interstitial collagenase                  | MMP1_HUMAN               | 100.0% | 15 | 16.40% | 6.17 | 42,635 |
| 85 | Pyruvate kinase isozymes M1/M2            | KPYM_HUMAN               | 100.0% | 14 | 17.90% | 7.95 | 57,806 |
| 86 | Protein disulfide-isomerase A3            | PDIA3_HUMAN              | 100.0% | 17 | 18.80% | 5.61 | 54,265 |
| 87 | Thioredoxin domain-containing protein 5   | TXND5_HUMAN              | 100.0% | 15 | 16.40% | 5.37 | 44,460 |
| 88 | Tubulin beta chain                        | TBB5_HUMAN               | 100.0% | 24 | 30.40% | 4.78 | 49,671 |
| 89 | Alpha-2-HS-glycoprotein                   | FETUA_BOVIN              | 100.0% | 11 | 22.80% | 5.10 | 36,353 |
| 90 | Alpha-2-HS-glycoprotein                   | FETUA_BOVIN              | 100.0% | 26 | 27.30% | 5.10 | 36,353 |
| 91 | Alpha-1-antitrypsin                       | A1AT_BOVIN               | 100.0% | 21 | 19.50% | 5.98 | 43,694 |
| 92 | Serum albumin                             | ALBU_BOVIN               | 100.0% | 25 | 25.50% | 5.60 | 66,433 |
| 93 | Serotransferrin                           | TRFE_BOVIN               | 100.0% | 12 | 11.80% | 6.50 | 75,830 |
| 94 | Transitional endoplasmic reticulum ATPase | TERA_HUMAN               | 100.0% | 15 | 9.18%  | 5.14 | 89,191 |
| 95 | Cadherin-5                                | CADH5_HUMAN              | 99.8%  | 2  | 2.30%  | 5.01 | 82,578 |
| 96 | von Willebrand antigen 2                  | VWF_HUMAN<br>(AA 23-763) | 100.0% | 9  | 6.07%  | 5.06 | 81,350 |
