# Supplementary material for: Glycoproteomic Analysis of the Secretome of Human Endothelial Cells
Source: PubMed Central journal article supplement — Mol Cell Proteomics. 2013 Jan 23;12(4):956–78. doi: 10.1074/mcp.M112.024018 (PMC3617342; doi:10.1074/mcp.m112.024018), 2013-01-23
Supplement: supp_M112.024018_mcp.M112.024018-4.pdf [file supp_M112.024018_mcp.M112.024018-4.pdf]

**Supplemental Table 4. Glycopeptides identified by PNGase F + H<sub>2</sub><sup>18</sup>O method.**

| Protein name                                             | UniProt ID  | Peptide                  | Starting position | Glycosite | Type      | No. of Spectra | Max Mascot Ion score |
|----------------------------------------------------------|-------------|--------------------------|-------------------|-----------|-----------|----------------|----------------------|
| HLA class I histocompatibility antigen, Cw-2 alpha chain | 1C02_HUMAN  | \$GYYN@QSEAGSHTLQR       | 107               | N110      | Known     | 11             | 66.9                 |
| Aminopeptidase N                                         | AMPN_HUMAN  | AEFN@ITLIHPK             | 231               | N234      | Known     | 3              | 53.5                 |
|                                                          |             | AEFN@ITLIHPK             | 231               | N234      | Known     | 2              | 45.2                 |
|                                                          |             | \$N@ATLVNEADk            | 818               | N818      | Known     | 10             | 49.9                 |
|                                                          |             | \$N@ATLVNEADK            | 818               | N818      | Known     | 4              | 60.2                 |
|                                                          |             | N@ATLVnEADk              | 818               | N818      | Known     | 1              | 40.6                 |
| Alpha-N-acetylglucosaminidase                            | ANAG_HUMAN  | \$VFPQVN@VTK             | 256               | N261      | Potential | 1              | 36.4                 |
| Angiopoietin-2                                           | ANGP2_HUMAN | LTDVEAQVLN@QTTR          | 142               | N151      | Potential | 7              | 76.6                 |
|                                                          |             | \$IVTATVN@nSVLQK         | 234               | N240      | Potential | 3              | 47.2                 |
|                                                          |             | IVTATVN@NSVLQK           | 234               | N240      | Potential | 2              | 44.1                 |
| Basigin (Fragment)                                       | BASI_HUMAN  | ILLTcSLN@DSATEVTGHR      | 37                | N44       | Novel     | 1              | 46.1                 |
| Cadherin-13                                              | CAD13_HUMAN | \$N@ITAVGk               | 86                | N86       | Known     | 2              | 39.3                 |
| Cadherin-2 (Fragment)                                    | CADH2_HUMAN | SN@ISILR                 | 662               | N663      | Novel     | 3              | 38.3                 |
| Dipeptidyl peptidase 1                                   | CATC_HUMAN  | \$DVN@cSVmGPQEK          | 51                | N53       | Known     | 8              | 51.2                 |
|                                                          |             | DVN@cSVmGPQEk            | 51                | N53       | Known     | 3              | 41.6                 |
| Cathepsin D                                              | CATD_HUMAN  | \$GSLSYLN@VTR            | 257               | N263      | Known     | 6              | 47.1                 |
|                                                          |             | GSLSYLN@VTR              | 257               | N263      | Known     | 17             | 71.7                 |
| CD109 antigen                                            | CD109_HUMAN | \$TQDEILFSN@STR          | 110               | N118      | Known     | 9              | 73.9                 |
|                                                          |             | TQDEILFSN@STR            | 110               | N118      | Known     | 16             | 85.0                 |
| CD166 antigen                                            | CD166_HUMAN | N@ATVVWmk                | 361               | N361      | Potential | 1              | 39.3                 |
| CD59 glycoprotein                                        | CD59_HUMAN  | <u>TAVN@cSSDFDAcLITk</u> | 40                | N43       | Known     | 2              | 67.9                 |
|                                                          |             | <u>TAVN@cSSDFDAcLITK</u> | 40                | N43       | Known     | 13             | 102.0                |
| Clusterin                                                | CLUS_HUMAN  | \$LAN@LTQGEDQYYLR        | 372               | N374      | Known     | 1              | 58.3                 |
|                                                          |             | LAN@LTQGEDQYYLR          | 372               | N374      | Known     | 20             | 78.1                 |

|                                                              |             |                                     |      |           |           |    |      |
|--------------------------------------------------------------|-------------|-------------------------------------|------|-----------|-----------|----|------|
| Collagen alpha-2(V) chain                                    | CO5A2_HUMAN | EASQN@ITYick                        | 1396 | N1400     | Potential | 2  | 42.3 |
| Dystroglycan                                                 | DAG1_HUMAN  | N@cSTITLQN@ITR                      | 641  | N641      | Potential | 20 | 84.2 |
| EGF domain-specific O-linked N-acetylglucosamine transferase | EOGT_HUMAN  | LN@ITQEGPk                          | 353  | N354      | Potential | 1  | 37.2 |
| Ephrin type-A receptor 2                                     | EPHA2_HUMAN | TASVSIN@QTEPPk                      | 429  | N435      | Known     | 1  | 49.9 |
| Ephrin type-B receptor 2                                     | EPHB2_HUMAN | \$AGFEAVEN@GTVcR                    | 258  | N265      | Potential | 12 | 63.6 |
| Erythroid membrane-associated protein                        | ERMAP_HUMAN | cLIqVGN@LSK                         | 126  | N132      | Potential | 1  | 38.5 |
| Peptidyl-prolyl cis-trans isomerase FKBP10                   | FKB10_HUMAN | YHYN@GTFEDGk                        | 67   | N70       | Potential | 9  | 52.0 |
| Follistatin-related protein 1                                | FSTL1_HUMAN | \$GSN@YSEILDk                       | 142  | N144      | Potential | 9  | 45.1 |
|                                                              |             | \$GSN@YSEILDK                       | 142  | N144      | Potential | 4  | 44.5 |
|                                                              |             | GSN@YSEILDK                         | 142  | N144      | Potential | 2  | 41.4 |
|                                                              |             | \$FVEQN@ETAIn@ITTYPDQENnK           | 171  | N175,N180 | Known     | 1  | 52.3 |
|                                                              |             | FVEQN@ETAIn@ITTYPDQENnK             | 171  | N175,N180 | Known     | 1  | 67.7 |
| N-acetylglucosamine-6-sulfatase                              | GNS_HUMAN   | \$GASN@LTWR                         | 402  | N405      | Potential | 2  | 38.8 |
| Golgi membrane protein 1                                     | GOLM1_HUMAN | \$AVLVnN@ITTGER                     | 104  | N109      | Known     | 6  | 62.3 |
|                                                              |             | \$AVLVNN@ITTGER                     | 104  | N109      | Known     | 2  | 45.0 |
| Granulins                                                    | GRN_HUMAN   | \$EN@ATTDLLTK                       | 264  | N265      | Known     | 1  | 41.3 |
|                                                              |             | EN@ATTDLLTK                         | 264  | N265      | Known     | 2  | 38.8 |
| Beta-hexosaminidase subunit alpha                            | HEXA_HUMAN  | SAEGTFFIN@k                         | 149  | N157      | Known     | 3  | 52.3 |
| Hedgehog-interacting protein                                 | HHIP_HUMAN  | \$IFSVTN@NTEcGk                     | 94   | N99       | Potential | 9  | 74.7 |
|                                                              |             | IFSVTN@nTEcGk                       | 94   | N99       | Potential | 1  | 40.1 |
|                                                              |             | IFSVTN@NTEcGk                       | 94   | N99       | Potential | 14 | 63.8 |
| Hypoxia up-regulated protein 1                               | HYOU1_HUMAN | VFGSQN@LTTVk                        | 510  | N515      | Known     | 8  | 51.1 |
|                                                              |             | \$AEPPLN@ASASDQGEK                  | 926  | N931      | Known     | 3  | 62.5 |
| Intercellular adhesion molecule 2                            | ICAM2_HUMAN | <u>\$GSLEVN@cSTTCnQPEVGGLETSLDK</u> | 42   | N47       | Known     | 4  | 82.3 |
|                                                              |             | <u>\$GSLEVN@cSTTCnQPEVGGLETSLDK</u> | 42   | N47       | Known     | 10 | 88.5 |
|                                                              |             | \$QESmnSN@VSVYQPPR                  | 99   | N105      | Known     | 2  | 46.3 |
|                                                              |             | \$QESmNSN@VSVYQPPR                  | 99   | N105      | Known     | 4  | 49.3 |

|                                             |             |                        |      |       |           |    |      |
|---------------------------------------------|-------------|------------------------|------|-------|-----------|----|------|
|                                             |             | QESmnSN@VSVYQPPR       | 99   | N105  | Known     | 5  | 41.7 |
|                                             |             | QESmnSN@VSVYQPPR       | 99   | N105  | Known     | 2  | 48.6 |
|                                             |             | QESMnSN@VSVYQPPR       | 99   | N105  | Known     | 1  | 44.9 |
|                                             |             | QESmNSN@VSVYQPPR       | 99   | N105  | Known     | 11 | 72.1 |
|                                             |             | \$GN@ETLHYETFGk        | 152  | N153  | Known     | 19 | 64.9 |
|                                             |             | \$GN@ETLHYETFGK        | 152  | N153  | Known     | 16 | 60.5 |
|                                             |             | GN@ETLHYETFGK          | 152  | N153  | Known     | 1  | 33.6 |
|                                             |             | \$AAPAPQEATATFN@STADR  | 164  | N176  | Known     | 34 | 86.4 |
|                                             |             | AAPAPQEATATFN@STADR    | 164  | N176  | Known     | 14 | 79.5 |
| ICOS ligand                                 | ICOSL_HUMAN | \$LFN@VTPQDEQK         | 100  | N102  | Known     | 1  | 39.4 |
| Ig gamma-4 chain C region                   | IGHG4_HUMAN | \$EEQFN@STYR           | 173  | N177  | Known     | 4  | 38.9 |
| Interleukin-6 receptor subunit beta         | IL6RB_HUMAN | ETHLETN@FTLk           | 151  | N157  | Known     | 3  | 57.1 |
|                                             |             | SHLQN@YTVN@ATk         | 375  | N379  | Known     | 1  | 58.6 |
|                                             |             | \$LTVN@LTnDR           | 387  | N390  | Known     | 5  | 43.4 |
|                                             |             | \$LTVN@LTNDR           | 387  | N390  | Known     | 3  | 40.7 |
|                                             |             | LTVN@LTNDR             | 387  | N390  | Known     | 1  | 45.6 |
| Interleukin-1 receptor-like 1               | ILRL1_HUMAN | NAN@LTcSAcFGk          | 230  | N232  | Potential | 6  | 60.8 |
| Integrin alpha-2                            | ITA2_HUMAN  | \$GEYFVN@VTTR          | 1069 | N1074 | Potential | 3  | 42.1 |
| Integrin alpha-5                            | ITA5_HUMAN  | VTGLN@cTTNHPINPk       | 864  | N868  | Potential | 1  | 55.1 |
| Integrin beta-1                             | ITB1_HUMAN  | NPcTSEQN@cTSPFSYk      | 205  | N212  | Known     | 1  | 40.6 |
| Integrin beta-5                             | ITB5_HUMAN  | SN@LTVLR               | 704  | N705  | Potential | 10 | 38.3 |
| Lysosome-associated membrane glycoprotein 1 | LAMP1_HUMAN | \$SScGKEN@TSDPSLVIAFGR | 78   | N84   | Known     | 7  | 66.7 |
|                                             |             | SScGKEN@TSDPSLVIAFGR   | 78   | N84   | Known     | 7  | 50.4 |
|                                             |             | \$EN@TSDPSLVIAFGR      | 83   | N84   | Known     | 7  | 79.4 |
|                                             |             | EN@TSDPSLVIAFGR        | 83   | N84   | Known     | 14 | 79.9 |
|                                             |             | <u>GHTLTLN@FTR</u>     | 97   | N103  | Known     | 2  | 40.6 |
|                                             |             | \$LLNINPN@k            | 255  | N261  | Known     | 1  | 33.0 |

|                                                          |             |                        |     |      |           |    |      |
|----------------------------------------------------------|-------------|------------------------|-----|------|-----------|----|------|
|                                                          |             | LLNINPN@k              | 255 | N261 | Known     | 2  | 38.7 |
| Lysosome-associated membrane glycoprotein 2              | LAMP2_HUMAN | \$VASVININPN@TTHSTGScR | 248 | N257 | Known     | 1  | 52.9 |
|                                                          |             | VASVININPN@TTHSTGScR   | 248 | N257 | Known     | 2  | 75.1 |
|                                                          |             | LN@SSTik               | 274 | N275 | Known     | 7  | 42.6 |
|                                                          |             | \$VQPFN@VTQGk          | 352 | N356 | Known     | 6  | 51.0 |
|                                                          |             | \$VQPFN@VTQGK          | 352 | N356 | Known     | 6  | 63.4 |
|                                                          |             | VQPFN@VTQGk            | 352 | N356 | Known     | 2  | 47.7 |
| Latent-transforming growth factor beta-binding protein 2 | LTBP2_HUMAN | DEcWcPAN@STGk          | 414 | N421 | Potential | 11 | 49.9 |
| Lysosomal alpha-glucosidase                              | LYAG_HUMAN  | N@NTIVNELVR            | 882 | N882 | Known     | 5  | 50.7 |
| Lymphatic vessel endothelial hyaluronic acid receptor 1  | LYVE1_HUMAN | \$ANQQLN@FTEAK         | 48  | N53  | Known     | 9  | 60.0 |
|                                                          |             | ANQQLN@FTEAK           | 48  | N53  | Known     | 14 | 65.8 |
|                                                          |             | ANQQLN@FTEAK           | 48  | N53  | Known     | 1  | 38.5 |
| Tyrosine-protein kinase Mer                              | MERTK_HUMAN | SDN@GSYIck             | 168 | N170 | Potential | 2  | 34.4 |
|                                                          |             | \$ELLEEVGQN@GSR        | 434 | N442 | Known     | 13 | 48.1 |
|                                                          |             | ELLEEVGQN@GSR          | 434 | N442 | Known     | 4  | 49.2 |
| Hepatocyte growth factor receptor                        | MET_HUMAN   | \$AN@LSGGVWk           | 105 | N106 | Known     | 1  | 37.8 |
| MHC class I polypeptide-related sequence A               | MICA_HUMAN  | SEASEGN@ITVTcR         | 214 | N220 | Potential | 1  | 58.2 |
| MHC class I polypeptide-related sequence B               | MICB_HUMAN  | N@ITLTWR               | 234 | N234 | Novel     | 1  | 34.8 |
| Multimerin-1                                             | MMRN1_HUMAN | LQN@LTLPTN@ASIK        | 112 | N114 | Known     | 1  | 47.1 |
|                                                          |             | FNPGAESVLSN@STLk       | 125 | N136 | Known     | 4  | 69.3 |
|                                                          |             | FNPGAESVLSN@STLk       | 125 | N136 | Known     | 6  | 62.4 |
|                                                          |             | VN@ESVVSIAAQk          | 430 | N431 | Potential | 9  | 55.3 |
|                                                          |             | SILYYESLN@k            | 499 | N507 | Potential | 1  | 40.4 |
|                                                          |             | LN@QSNFQk              | 815 | N816 | Potential | 2  | 40.0 |
|                                                          |             | TQAALSN@LTccIDR        | 975 | N981 | Potential | 2  | 53.4 |
| Myelin protein zero-like protein 1                       | MPZL1_HUMAN | EIFVAN@GTQGk           | 45  | N50  | Known     | 1  | 49.3 |
| C-type mannose receptor 2                                | MRC2_HUMAN  | \$VTPAcN@TSLPAQR       | 64  | N69  | Known     | 6  | 50.9 |

|                                                                      |             |                       |     |      |           |    |      |
|----------------------------------------------------------------------|-------------|-----------------------|-----|------|-----------|----|------|
|                                                                      |             | <u>VTPAcN@TSLPAQR</u> | 64  | N69  | Known     | 14 | 64.3 |
| Natural cytotoxicity triggering receptor 3 ligand 1                  | NR3L1_HUMAN | NmDGTfN@VTSclK        | 202 | N208 | Known     | 3  | 65.5 |
|                                                                      |             | SN@FTLTAAR            | 241 | N242 | Known     | 3  | 43.8 |
| Neuronal cell adhesion molecule                                      | NRCAM_HUMAN | <u>FN@HTQTIQQk</u>    | 222 | N223 | Potential | 1  | 39.7 |
|                                                                      |             | \$ERPPTFLTPEGN@ASNk   | 265 | N276 | Known     | 4  | 46.1 |
|                                                                      |             | \$ERPPTFLTPEGN@ASNk   | 265 | N276 | Known     | 1  | 43.1 |
|                                                                      |             | ERPPTFLTPEGN@ASNk     | 265 | N276 | Known     | 1  | 46.8 |
|                                                                      |             | ERPPTFLTPEGN@ASNk     | 265 | N276 | Known     | 3  | 53.2 |
| Neuropilin-1                                                         | NRP1_HUMAN  | GPEcSQN@YTTSPGVIK     | 144 | N150 | Known     | 1  | 44.5 |
| Neuropilin-2                                                         | NRP2_HUMAN  | N@FTSPN@GTIESPGFPEK   | 152 | N152 | Known     | 1  | 53.8 |
|                                                                      |             | N@FTSPN@GTIESPGFPEK   | 152 | N152 | Known     | 1  | 36.6 |
| Protocadherin gamma-A11                                              | PCDGB_HUMAN | \$GSFVGN@ISk          | 43  | N48  | Potential | 3  | 42.8 |
| Protocadherin gamma-B5                                               | PCDGH_HUMAN | DQGSPALSAN@VSLR       | 532 | N541 | Potential | 1  | 38.1 |
| Platelet-derived growth factor subunit B                             | PDGFB_HUMAN | LLHGDPGEEDGAELDLN@mTR | 47  | N63  | Novel     | 2  | 51.8 |
| Basement membrane-specific heparan sulfate proteoglycan core protein | PGBM_HUMAN  | \$ALVN@FTR            | 86  | N89  | Potential | 1  | 34.0 |
| Procollagen-lysine,2-oxoglutarate 5-dioxygenase 1                    | PLOD1_HUMAN | \$EQIN@ITLDHR         | 194 | N197 | Potential | 4  | 47.5 |
| Procollagen-lysine,2-oxoglutarate 5-dioxygenase 3                    | PLOD3_HUMAN | SAEFFN@YTVR           | 58  | N63  | Potential | 9  | 52.4 |
| Palmitoyl-protein thioesterase 1                                     | PPT1_HUMAN  | N@HSIFLADINQER        | 197 | N197 | Known     | 5  | 60.9 |
| Major prion protein                                                  | PRIO_HUMAN  | \$GEN@FTETDVK         | 195 | N197 | Known     | 3  | 43.7 |
|                                                                      |             | \$GEN@FTETDVK         | 195 | N197 | Known     | 17 | 60.8 |
| Serine protease 23                                                   | PRS23_HUMAN | QYLSYETLYAN@GSR       | 83  | N93  | Potential | 1  | 42.7 |
| Inactive tyrosine-protein kinase 7                                   | PTK7_HUMAN  | <u>\$SAN@ASFNIK</u>   | 114 | N116 | Known     | 1  | 36.8 |
|                                                                      |             | \$DGTPLSDGQSN@HTVSSk  | 165 | N175 | Known     | 1  | 44.2 |
|                                                                      |             | \$DGTPLSDGQSN@HTVSSK  | 165 | N175 | Known     | 13 | 63.3 |
|                                                                      |             | DGTPLSDGQSN@HTVSSk    | 165 | N175 | Known     | 3  | 69.8 |
|                                                                      |             | DDAGN@YTcIASnGPQGQIR  | 563 | N567 | Potential | 2  | 50.3 |
|                                                                      |             | DDAGN@YTcIASNGPQGqIR  | 563 | N567 | Potential | 1  | 49.1 |

|                                                            |             |                             |      |       |           |    |      |
|------------------------------------------------------------|-------------|-----------------------------|------|-------|-----------|----|------|
|                                                            |             | mHIFQN@GSLVIHDVAPEDSGR      | 641  | N646  | Known     | 1  | 44.8 |
| Poliovirus receptor-related protein 1                      | PVRL1_HUMAN | NPN@GTVTVISR                | 200  | N202  | Known     | 11 | 74.6 |
| Reticulocalbin-3                                           | RCN3_HUMAN  | N@ATYGHYAPGEEFHDVEDAETYk    | 140  | N140  | Known     | 1  | 48.7 |
| Proactivator polypeptide                                   | SAP_HUMAN   | TN@STFVQALVEHVk             | 214  | N215  | Known     | 1  | 43.8 |
|                                                            |             | <u>\$LIDnN@KTEK</u>         | 328  | N332  | Known     | 1  | 38.6 |
|                                                            |             | <u>LIDnN@KTEk</u>           | 328  | N332  | Known     | 9  | 50.5 |
| Semaphorin-4D                                              | SEM4D_HUMAN | DVN@YTQIVVDR                | 417  | N419  | Known     | 3  | 42.5 |
| Tyrosine-protein phosphatase non-receptor type substrate 1 | SHPS1_HUMAN | \$GTAN@LSETIR               | 242  | N245  | Known     | 1  | 52.5 |
|                                                            |             | GTAN@LSETIR                 | 242  | N245  | Known     | 1  | 40.2 |
|                                                            |             | \$AEnQVN@VTcQVR             | 265  | N270  | Known     | 1  | 46.5 |
|                                                            |             | \$AENQVN@VTcQVR             | 265  | N270  | Known     | 8  | 68.6 |
|                                                            |             | <u>LQLTWLEnGN@VSR</u>       | 283  | N292  | Known     | 9  | 90.8 |
| Stabilin-1                                                 | STAB1_HUMAN | TmN@ASLAQQLcR               | 411  | N413  | Potential | 4  | 49.4 |
|                                                            |             | \$SLEAQGN@SSHLDADTVR        | 1172 | N1178 | Potential | 5  | 57.5 |
|                                                            |             | SLEAQGN@SSHLDADTVR          | 1172 | N1178 | Potential | 1  | 56.4 |
| Tissue factor pathway inhibitor 2                          | TFPI2_HUMAN | \$DEGLcSAN@VTR              | 163  | N170  | Potential | 1  | 38.5 |
| Thrombospondin-1                                           | TSP1_HUMAN  | \$VScPlmPcSN@ATVPDGEccPR    | 351  | N360  | Potential | 1  | 40.5 |
|                                                            |             | <u>\$VVN@STTGPGEHLR</u>     | 1065 | N1067 | Known     | 11 | 54.4 |
| Vascular endothelial growth factor receptor 1              | VGFR1_HUMAN | VTSPN@ITVTLk                | 160  | N164  | Potential | 1  | 37.1 |
| Vascular endothelial growth factor receptor 2              | VGFR2_HUMAN | \$VIGN@DTGAYk               | 93   | N96   | Potential | 1  | 39.4 |
|                                                            |             | VIGN@DTGAYk                 | 93   | N96   | Potential | 1  | 40.1 |
| von Willebrand factor                                      | VWF_HUMAN   | <u>\$ASPPSSScN@ISSGEmQk</u> | 203  | N211  | Potential | 24 | 77.1 |
|                                                            |             | <u>\$ASPPSSScN@ISSGEMQk</u> | 203  | N211  | Potential | 8  | 76.1 |
|                                                            |             | <u>\$ASPPSSScN@ISSGEmQK</u> | 203  | N211  | Potential | 6  | 49.6 |
|                                                            |             | <u>\$ASPPSSScN@ISSGEMQK</u> | 203  | N211  | Potential | 25 | 89.6 |
|                                                            |             | <u>ASPPSSScN@ISSGEmQk</u>   | 203  | N211  | Potential | 23 | 80.7 |
|                                                            |             | <u>ASPPSSScN@ISSGEMQk</u>   | 203  | N211  | Potential | 19 | 89.7 |

|                           |             |                            |      |       |           |    |       |
|---------------------------|-------------|----------------------------|------|-------|-----------|----|-------|
|                           |             | <u>ASPPSSScN@ISSGEmQK</u>  | 203  | N211  | Potential | 12 | 95.2  |
|                           |             | <u>ASPPSSScN@ISSGEMQK</u>  | 203  | N211  | Potential | 17 | 93.0  |
|                           |             | <u>\$GQVYLQcGTPcN@LTcR</u> | 655  | N666  | Potential | 7  | 48.8  |
|                           |             | <u>GQVYLQcGTPcN@LTcR</u>   | 655  | N666  | Potential | 10 | 67.2  |
|                           |             | mEAcmLN@GTVIGPGk           | 2579 | N2585 | Known     | 6  | 64.9  |
|                           |             | mEAcmLN@GTVIGPGK           | 2579 | N2585 | Known     | 1  | 38.3  |
| <b>Bovine proteins</b>    |             |                            |      |       |           |    |       |
| Alpha-1-acid glycoprotein | A1AG_BOVIN  | TFmLAASWN@GTK              | 128  | N136  | Potential | 2  | 56.1  |
| Alpha-2-antiplasmin       | A2AP_BOVIN  | nN@mSFVVLmPTR              | 295  | N296  | Known     | 1  | 34.1  |
|                           |             | NN@mSFVVLmPTR              | 295  | N296  | Known     | 6  | 43.0  |
|                           |             | NN@MSFVVLmPTR              | 295  | N296  | Known     | 1  | 39.5  |
| Apolipoprotein D          | APOD_BOVIN  | \$GScIQAN@YSLk             | 59   | N65   | Potential | 3  | 46.1  |
|                           |             | \$GScIQAN@YSLK             | 59   | N65   | Potential | 13 | 52.8  |
|                           |             | GScIQAN@YSLk               | 59   | N65   | Potential | 3  | 43.0  |
|                           |             | \$ADGTVNQIEGEATPEN@ITEPAK  | 83   | N98   | Potential | 3  | 51.0  |
|                           |             | ADGTVNQIEGEATPEN@ITEPAK    | 83   | N98   | Potential | 5  | 52.6  |
|                           |             | ADGTVNQIEGEATPEN@ITEPAK    | 83   | N98   | Potential | 6  | 79.3  |
| Beta-2-glycoprotein 1     | APOH_BOVIN  | VcPFAGILEN@GTVR            | 83   | N92   | Known     | 10 | 101.0 |
|                           |             | FGN@WSAQPSck               | 251  | N253  | Known     | 4  | 38.5  |
| Coagulation factor V      | FA5_BOVIN   | \$GSYEIIQDANEN@K           | 941  | N952  | Potential | 4  | 92.6  |
| Alpha-fetoprotein         | FETA_BOVIN  | <u>\$AEN@ATEcFETk</u>      | 195  | N197  | Potential | 6  | 74.5  |
|                           |             | <u>\$AEN@ATEcFETK</u>      | 195  | N197  | Potential | 18 | 81.0  |
|                           |             | <u>\$AN@FTEIQk</u>         | 250  | N251  | Potential | 2  | 46.5  |
|                           |             | <u>\$AN@FTEIQK</u>         | 250  | N251  | Potential | 2  | 40.0  |
| Alpha-2-HS-glycoprotein   | FETUA_BOVIN | <u>kLcPDcPLLAPLN@DSR</u>   | 144  | N156  | Known     | 2  | 53.5  |
|                           |             | <u>\$LcPDcPLLAPLN@DSR</u>  | 145  | N156  | Known     | 13 | 57.8  |

|                                              |             |                         |     |      |           |    |      |
|----------------------------------------------|-------------|-------------------------|-----|------|-----------|----|------|
|                                              |             | <u>LcPDcPLLAPLN@DSR</u> | 145 | N156 | Known     | 4  | 64.4 |
| Hemopexin                                    | HEMO_BOVIN  | SWPAVGN@cSSAIR          | 182 | N188 | Potential | 4  | 57.7 |
|                                              |             | \$FDPVTGEVN@STYPR       | 210 | N218 | Potential | 18 | 70.6 |
|                                              |             | FDPVTGEVN@STYPR         | 210 | N218 | Potential | 20 | 82.9 |
| Inter-alpha-trypsin inhibitor heavy chain H4 | ITIH4_BOVIN | \$LAEALTTSQN@k          | 199 | N208 | Potential | 2  | 51.7 |
|                                              |             | \$LAEALTTSQN@K          | 199 | N208 | Potential | 2  | 49.1 |
| Serpin A3-1                                  | SPA31_BOVIN | \$FN@LTEIQEK            | 99  | N100 | Potential | 6  | 43.7 |
|                                              |             | \$FN@LTEIQEK            | 99  | N100 | Potential | 2  | 47.6 |
|                                              |             | FN@LTEIQEK              | 99  | N100 | Potential | 9  | 60.0 |
|                                              |             | FN@LTEIQEK              | 99  | N100 | Potential | 16 | 50.6 |
| Serpin A3-3                                  | SPA33_BOVIN | SNYELN@DTLSQmGik        | 313 | N318 | Potential | 9  | 86.5 |
|                                              |             | SNYELN@DTLSQmGIK        | 313 | N318 | Potential | 1  | 45.2 |
| Serotransferrin                              | TRFE_BOVIN  | \$N@SSLcALcIGSEK        | 514 | N514 | Potential | 5  | 60.1 |
|                                              |             | N@SSLcALcIGSEK          | 514 | N514 | Potential | 6  | 56.3 |
| Pantetheinase                                | VNN1_BOVIN  | \$EIGGN@YTVcQR          | 350 | N354 | Potential | 1  | 46.2 |

Peptide modification symbols:

|    |                                           |   |                                    |   |                                  |
|----|-------------------------------------------|---|------------------------------------|---|----------------------------------|
| \$ | N-terminal TMT0 labelling (+224.15)       | k | TMT0 labelling of lysine (+224.15) |   |                                  |
| @  | Deamidation-O18 (+2.99)                   | n | Deamidation of asparagine (+0.98)  | q | Deamidation of glutamine (+0.98) |
| c  | Carbamidomethylation of cysteine (+57.02) |   |                                    |   |                                  |
| m  | Oxidation of methionine (+15.99)          |   |                                    |   |                                  |

Underlined glycopeptides were also detected by HCD-ETD method (Table 2)
