# Supplementary material for: Glycoproteomic Analysis of the Secretome of Human Endothelial Cells
Source: PubMed Central journal article supplement — Mol Cell Proteomics. 2013 Jan 23;12(4):956–78. doi: 10.1074/mcp.M112.024018 (PMC3617342; doi:10.1074/mcp.m112.024018), 2013-01-23
Supplement: supp_M112.024018_mcp.M112.024018-5.pdf [file supp_M112.024018_mcp.M112.024018-5.pdf]

**Supplemental Table 5. Spectral count of proteins identified by Q Exactive MS after glycoprotein enrichment.**

| Identified Proteins                                                        | UniProt ID  | Mw      | Input       | Glycoprotein | Flow-through | Mann-Whitney-Wilcoxon Test (p) | Fold* |
|----------------------------------------------------------------------------|-------------|---------|-------------|--------------|--------------|--------------------------------|-------|
| <b>Proteins enriched in Glycoprotein fraction compared to Flow-Through</b> |             |         |             |              |              |                                |       |
| von Willebrand factor                                                      | VWF_HUMAN   | 309 kDa | 60.50±14.62 | 68.00±11.49  | 12.25±1.50   | 0.028                          | 5.55  |
| EGF-containing fibulin-like extracellular matrix protein 1                 | FBLN3_HUMAN | 55 kDa  | 10.25±2.99  | 19.75±2.75   | 1.75±1.50    | 0.029                          | 11.29 |
| Plasminogen activator inhibitor 1                                          | PAI1_HUMAN  | 45 kDa  | 1.50±1.29   | 10.00±1.41   | 0            | 0.020                          | ∞     |
| Lysyl oxidase homolog 2                                                    | LOXL2_HUMAN | 87 kDa  | 1.75±1.50   | 9.50±1.91    | 0            | 0.020                          | ∞     |
| Fibronectin                                                                | FINC_HUMAN  | 263 kDa | 4.75±2.06   | 9.25±2.75    | 0            | 0.021                          | ∞     |
| Tyrosine-protein kinase receptor Tie-1                                     | TIE1_HUMAN  | 125 kDa | 1.50±1.91   | 9.00±1.41    | 0            | 0.020                          | ∞     |
| Protein jagged-1                                                           | JAG1_HUMAN  | 134 kDa | 0.25±0.50   | 7.75±2.87    | 0            | 0.020                          | ∞     |
| Tropomyosin alpha-4 chain <sup>(a)</sup>                                   | TPM4_HUMAN  | 29 kDa  | 11.00±4.83  | 6.75±0.50    | 2.00±0.82    | 0.026                          | 3.38  |
| Cell surface glycoprotein MUC18                                            | MUC18_HUMAN | 72 kDa  | 1.25±0.96   | 6.00±1.63    | 0.25±0.50    | 0.026                          | 24.00 |
| Alpha-actinin-4                                                            | ACTN4_HUMAN | 105 kDa | 3.75±1.50   | 5.50±1.91    | 1.50±1.73    | 0.058                          | 3.67  |
| 78 kDa glucose-regulated protein                                           | GRP78_HUMAN | 72 kDa  | 12.00±1.83  | 5.25±0.96    | 3.25±1.26    | 0.078                          | 1.62  |
| Protocadherin-10                                                           | PCD10_HUMAN | 113 kDa | 1.00±0.82   | 5.25±1.71    | 0            | 0.021                          | ∞     |
| Thrombospondin-1                                                           | TSP1_HUMAN  | 129 kDa | 29.50±4.12  | 5.25±3.30    | 0            | 0.021                          | ∞     |
| Neuronal cell adhesion molecule                                            | NRCAM_HUMAN | 144 kDa | 1.25±1.26   | 5.00±1.41    | 0            | 0.020                          | ∞     |
| 40S ribosomal protein SA                                                   | RSSA_HUMAN  | 33 kDa  | 0.75±0.96   | 4.75±1.71    | 0.75±1.50    | 0.037                          | 6.33  |
| Low-density lipoprotein receptor                                           | LDLR_HUMAN  | 95 kDa  | 0.50±0.58   | 3.75±1.71    | 0            | 0.021                          | ∞     |
| Proactivator polypeptide                                                   | SAP_HUMAN   | 58 kDa  | 0.75±0.50   | 3.75±1.26    | 1.00±0.82    | 0.040                          | 3.75  |
| Procollagen-lysine,2-oxoglutarate 5-dioxygenase 3                          | PLOD3_HUMAN | 85 kDa  | 0           | 3.75±2.75    | 0            | 0.021                          | ∞     |
| Protein disulfide-isomerase                                                | PDIA1_HUMAN | 57 kDa  | 3.00±2.94   | 3.50±1.29    | 0.25±0.50    | 0.027                          | 14.00 |
| Beta-hexosaminidase subunit beta                                           | HEXB_HUMAN  | 63 kDa  | 0.25±0.50   | 3.25±2.63    | 0            | 0.021                          | ∞     |

|                                                          |             |         |           |           |           |       |       |
|----------------------------------------------------------|-------------|---------|-----------|-----------|-----------|-------|-------|
| Lymphatic vessel endothelial hyaluronic acid receptor 1  | LYVE1_HUMAN | 35 kDa  | 0.25±0.50 | 3.25±1.71 | 1.00±1.15 | 0.108 | 3.25  |
| Thioredoxin domain-containing protein 5                  | TXND5_HUMAN | 48 kDa  | 3.25±3.20 | 3.25±0.50 | 2.00±1.41 | 0.231 | 1.63  |
| Tyrosine-protein kinase-like 7                           | PTK7_HUMAN  | 118 kDa | 0.25±0.50 | 3.25±1.50 | 0         | 0.020 | ∞     |
| Cysteine-rich motor neuron 1 protein                     | CRIM1_HUMAN | 114 kDa | 1.00±1.41 | 3.00±0.00 | 0         | 0.013 | ∞     |
| Pentraxin-related protein PTX3                           | PTX3_HUMAN  | 42 kDa  | 1.50±1.00 | 3.00±0.00 | 0         | 0.013 | ∞     |
| Semaphorin-6B                                            | SEM6B_HUMAN | 95 kDa  | 0.50±0.58 | 3.00±0.82 | 0         | 0.020 | ∞     |
| 40S ribosomal protein S19                                | RS19_HUMAN  | 16 kDa  | 2.25±0.96 | 2.75±2.06 | 0.25±0.50 | 0.122 | 11.00 |
| Cadherin-5                                               | CADH5_HUMAN | 88 kDa  | 0.75±0.50 | 2.75±1.26 | 0         | 0.020 | ∞     |
| Connective tissue growth factor                          | CTGF_HUMAN  | 38 kDa  | 4.25±2.22 | 2.75±1.26 | 1.25±0.50 | 0.122 | 2.20  |
| Calmodulin                                               | CALM_HUMAN  | 17 kDa  | 2.50±1.29 | 2.50±1.73 | 0.75±0.96 | 0.134 | 3.33  |
| Complement component C1q receptor                        | C1QR1_HUMAN | 69 kDa  | 0.25±0.50 | 2.50±1.00 | 0         | 0.018 | ∞     |
| Metalloproteinase inhibitor 1                            | TIMP1_HUMAN | 23 kDa  | 0.25±0.50 | 2.25±0.50 | 0.50±0.58 | 0.025 | 4.50  |
| Procollagen-lysine,2-oxoglutarate 5-dioxygenase 1        | PLOD1_HUMAN | 84 kDa  | 0.25±0.50 | 2.25±1.89 | 0         | 0.020 | ∞     |
| 40S ribosomal protein S21                                | RS21_HUMAN  | 9 kDa   | 0.25±0.50 | 2.00±0.82 | 0         | 0.020 | ∞     |
| 40S ribosomal protein S25                                | RS25_HUMAN  | 14 kDa  | 1.75±0.96 | 2.00±0.82 | 0         | 0.020 | ∞     |
| Cathepsin D                                              | CATD_HUMAN  | 45 kDa  | 0         | 2.00±0.82 | 0         | 0.020 | ∞     |
| Proteasome subunit alpha type-7                          | PSA7_HUMAN  | 28 kDa  | 1.25±1.50 | 2.00±0.82 | 0         | 0.020 | ∞     |
| Proteasome subunit beta type-6                           | PSB6_HUMAN  | 25 kDa  | 0.25±0.50 | 2.00±0.82 | 0         | 0.020 | ∞     |
| 40S ribosomal protein S28                                | RS28_HUMAN  | 8 kDa   | 1.00±0.00 | 1.75±0.50 | 0         | 0.018 | ∞     |
| Angiopoietin-2                                           | ANGP2_HUMAN | 57 kDa  | 0         | 1.75±0.96 | 0         | 0.020 | ∞     |
| C-type mannose receptor 2                                | MRC2_HUMAN  | 167 kDa | 0         | 1.75±1.26 | 0         | 0.067 | ∞     |
| Neurotrimin                                              | NTRI_HUMAN  | 38 kDa  | 0         | 1.75±0.50 | 0         | 0.018 | ∞     |
| Cathepsin Z                                              | CATZ_HUMAN  | 34 kDa  | 0.25±0.50 | 1.50±0.58 | 0         | 0.019 | ∞     |
| Golgi membrane protein 1                                 | GOLM1_HUMAN | 45 kDa  | 0         | 1.50±0.58 | 0         | 0.019 | ∞     |
| Histone H1.2                                             | H12_HUMAN   | 21 kDa  | 3.00±1.41 | 1.50±0.58 | 0         | 0.019 | ∞     |
| Latent-transforming growth factor beta-binding protein 2 | LTBP2_HUMAN | 195 kDa | 0.25±0.50 | 1.50±1.73 | 0         | 0.067 | ∞     |
| Lysosome-associated membrane glycoprotein 1              | LAMP1_HUMAN | 45 kDa  | 0.25±0.50 | 1.50±0.58 | 0         | 0.019 | ∞     |

|                                                   |             |         |           |           |           |       |      |
|---------------------------------------------------|-------------|---------|-----------|-----------|-----------|-------|------|
| Procollagen-lysine,2-oxoglutarate 5-dioxygenase 2 | PLOD2_HUMAN | 85 kDa  | 0         | 1.50±1.73 | 0         | 0.067 | ∞    |
| Proteasome subunit beta type-5                    | PSB5_HUMAN  | 28 kDa  | 1.25±1.26 | 1.50±1.29 | 0.50±0.58 | 0.288 | 3.00 |
| Protein CYR61                                     | CYR61_HUMAN | 42 kDa  | 0.75±0.96 | 1.50±1.00 | 0         | 0.018 | ∞    |
| Stabilin-1                                        | STAB1_HUMAN | 275 kDa | 0.75±1.50 | 1.50±1.29 | 0         | 0.069 | ∞    |
| Tissue-type plasminogen activator                 | TPA_HUMAN   | 63 kDa  | 0.25±0.50 | 1.50±1.00 | 0         | 0.018 | ∞    |
| Tyrosine-protein kinase receptor UFO              | UFO_HUMAN   | 98 kDa  | 0.50±0.58 | 1.50±0.58 | 0         | 0.019 | ∞    |
| 40S ribosomal protein S10                         | RS10_HUMAN  | 19 kDa  | 1.00±0.82 | 1.25±0.96 | 0         | 0.067 | ∞    |
| 40S ribosomal protein S11                         | RS11_HUMAN  | 18 kDa  | 4.00±2.16 | 1.25±1.50 | 0         | 0.186 | ∞    |
| 60S ribosomal protein L31                         | RL31_HUMAN  | 14 kDa  | 0.25±0.50 | 1.25±0.50 | 0         | 0.018 | ∞    |
| Alpha-actinin-1                                   | ACTN1_HUMAN | 103 kDa | 0.50±1.00 | 1.25±1.26 | 0.25±0.50 | 0.206 | 5.00 |
| Dystroglycan                                      | DAG1_HUMAN  | 97 kDa  | 0         | 1.25±0.96 | 0         | 0.067 | ∞    |
| Endoplasmin                                       | ENPL_HUMAN  | 92 kDa  | 3.00±2.71 | 1.25±1.50 | 0         | 0.186 | ∞    |
| Hedgehog-interacting protein                      | HHIP_HUMAN  | 79 kDa  | 0         | 1.25±0.50 | 0.25±0.50 | 0.058 | 5.00 |
| Proteasome subunit alpha type-1                   | PSA1_HUMAN  | 30 kDa  | 1.75±1.50 | 1.25±1.26 | 0.25±0.50 | 0.206 | 5.00 |
| Proteasome subunit alpha type-6                   | PSA6_HUMAN  | 27 kDa  | 0.25±0.50 | 1.25±1.50 | 0.75±0.96 | 0.757 | 1.67 |
| Tropomyosin alpha-3 chain                         | TPM3_HUMAN  | 33 kDa  | 1.00±0.82 | 1.25±0.50 | 0         | 0.018 | ∞    |
| 40S ribosomal protein S3                          | RS3_HUMAN   | 27 kDa  | 2.50±1.00 | 1.00±1.41 | 0.25±0.50 | 0.505 | 4.00 |
| Calreticulin                                      | CALR_HUMAN  | 48 kDa  | 4.00±3.56 | 1.00±0.82 | 0         | 0.067 | ∞    |
| Integrin beta-1                                   | ITB1_HUMAN  | 88 kDa  | 0         | 1.00±0.82 | 0         | 0.067 | ∞    |
| Intercellular adhesion molecule 2                 | ICAM2_HUMAN | 31 kDa  | 1.50±0.58 | 1.00±0.82 | 0.75±0.50 | 0.739 | 1.33 |
| Lysosomal protective protein                      | PPGB_HUMAN  | 54 kDa  | 0         | 1.00±0.82 | 0         | 0.067 | ∞    |
| Neuronal growth regulator 1                       | NEGR1_HUMAN | 39 kDa  | 0         | 1.00±0.82 | 0         | 0.067 | ∞    |
| Neuropilin-2                                      | NRP2_HUMAN  | 105 kDa | 0         | 1.00±1.41 | 0         | 0.186 | ∞    |
| Src substrate cortactin                           | SRC8_HUMAN  | 62 kDa  | 0         | 1.00±0.00 | 0         | 0.013 | ∞    |
| 14-3-3 protein beta/alpha                         | 1433B_HUMAN | 28 kDa  | 3.00±1.83 | 0.75±0.50 | 0         | 0.060 | ∞    |
| 60S acidic ribosomal protein P2                   | RLA2_HUMAN  | 12 kDa  | 1.00±0.82 | 0.75±0.96 | 0.25±0.50 | 0.505 | 3.00 |
| 60S ribosomal protein L22                         | RL22_HUMAN  | 15 kDa  | 1.25±1.50 | 0.75±0.50 | 0         | 0.060 | ∞    |

|                                                          |             |         |           |           |           |       |      |
|----------------------------------------------------------|-------------|---------|-----------|-----------|-----------|-------|------|
| 60S ribosomal protein L23a                               | RL23A_HUMAN | 18 kDa  | 1.50±1.29 | 0.75±0.96 | 0         | 0.186 | ∞    |
| Alpha-2-HS-glycoprotein                                  | FETUA_HUMAN | 39 kDa  | 4.75±3.40 | 0.75±0.50 | 0.25±0.50 | 0.247 | 3.00 |
| Ephrin-A5                                                | EFNA5_HUMAN | 26 kDa  | 0         | 0.75±0.50 | 0         | 0.060 | ∞    |
| Guanine nucleotide-binding protein subunit beta-2-like 1 | GBLP_HUMAN  | 35 kDa  | 4.50±1.73 | 0.75±0.50 | 0.25±0.50 | 0.247 | 3.00 |
| Hepatocyte growth factor receptor                        | MET_HUMAN   | 156 kDa | 0.25±0.50 | 0.75±0.96 | 0.25±0.50 | 0.505 | 3.00 |
| Insulin-like growth factor-binding protein 7             | IBP7_HUMAN  | 29 kDa  | 1.50±0.58 | 0.75±0.96 | 0         | 0.186 | ∞    |
| Palmitoyl-protein thioesterase 1                         | PPT1_HUMAN  | 34 kDa  | 0         | 0.75±0.50 | 0         | 0.060 | ∞    |
| Phospholipase D3                                         | PLD3_HUMAN  | 55 kDa  | 0         | 0.75±0.50 | 0         | 0.060 | ∞    |
| Poliovirus receptor                                      | PVR_HUMAN   | 45 kDa  | 0         | 0.75±0.50 | 0         | 0.060 | ∞    |
| Proteasome subunit alpha type-5                          | PSA5_HUMAN  | 26 kDa  | 1.25±1.26 | 0.75±0.96 | 0         | 0.186 | ∞    |
| Proteasome subunit beta type-1                           | PSB1_HUMAN  | 26 kDa  | 0         | 0.75±0.96 | 0         | 0.186 | ∞    |
| Proteasome subunit beta type-2                           | PSB2_HUMAN  | 23 kDa  | 0         | 0.75±1.50 | 0         | 0.453 | ∞    |
| Protein disulfide-isomerase A4                           | PDIA4_HUMAN | 73 kDa  | 1.50±1.73 | 0.75±0.50 | 0.25±0.50 | 0.247 | 3.00 |
| Putative tropomyosin alpha-3 chain-like protein          | TPM3L_HUMAN | 26 kDa  | 2.00±0.82 | 0.75±0.50 | 0         | 0.060 | ∞    |
| 40S ribosomal protein S14                                | RS14_HUMAN  | 16 kDa  | 0.25±0.50 | 0.50±0.58 | 0         | 0.181 | ∞    |
| 40S ribosomal protein S2                                 | RS2_HUMAN   | 31 kDa  | 0.25±0.50 | 0.50±1.00 | 0         | 0.453 | ∞    |
| 40S ribosomal protein S29                                | RS29_HUMAN  | 7 kDa   | 0.25±0.50 | 0.50±0.58 | 0         | 0.181 | ∞    |
| 60S ribosomal protein L10a                               | RL10A_HUMAN | 25 kDa  | 0.75±0.50 | 0.50±0.58 | 0.25±0.50 | 0.608 | 2.00 |
| 60S ribosomal protein L11                                | RL11_HUMAN  | 20 kDa  | 1.00±0.82 | 0.50±1.00 | 0         | 0.453 | ∞    |
| 60S ribosomal protein L26-like 1                         | RL26L_HUMAN | 17 kDa  | 0.25±0.50 | 0.50±1.00 | 0         | 0.453 | ∞    |
| 60S ribosomal protein L35                                | RL35_HUMAN  | 15 kDa  | 1.75±0.50 | 0.50±0.58 | 0         | 0.181 | ∞    |
| Beta-hexosaminidase subunit alpha                        | HEXA_HUMAN  | 61 kDa  | 0         | 0.50±0.58 | 0         | 0.181 | ∞    |
| Cathepsin B                                              | CATB_HUMAN  | 38 kDa  | 0.50±0.58 | 0.50±0.58 | 0.25±0.50 | 0.608 | 2.00 |
| CD109 antigen                                            | CD109_HUMAN | 162 kDa | 0         | 0.50±1.00 | 0         | 0.453 | ∞    |
| CD44 antigen                                             | CD44_HUMAN  | 82 kDa  | 0         | 0.50±1.00 | 0         | 0.453 | ∞    |
| Collagen alpha-1(VI) chain                               | CO6A1_HUMAN | 109 kDa | 0         | 0.50±0.58 | 0         | 0.181 | ∞    |
| Deoxyribonuclease-2-alpha                                | DNS2A_HUMAN | 40 kDa  | 0         | 0.50±0.58 | 0         | 0.181 | ∞    |

|                                                          |             |         |           |           |           |       |      |
|----------------------------------------------------------|-------------|---------|-----------|-----------|-----------|-------|------|
| Ephrin-A1                                                | EFNA1_HUMAN | 24 kDa  | 0         | 0.50±0.58 | 0         | 0.181 | ∞    |
| Epididymal secretory protein E1                          | NPC2_HUMAN  | 17 kDa  | 0         | 0.50±0.58 | 0         | 0.181 | ∞    |
| Fibulin-1                                                | FBLN1_HUMAN | 77 kDa  | 0         | 0.50±0.58 | 0         | 0.181 | ∞    |
| Gamma-glutamyl hydrolase                                 | GGH_HUMAN   | 36 kDa  | 0         | 0.50±0.58 | 0         | 0.181 | ∞    |
| GDP-fucose protein O-fucosyltransferase 1                | OFUT1_HUMAN | 44 kDa  | 0         | 0.50±0.58 | 0         | 0.181 | ∞    |
| HLA class I histocompatibility antigen, Cw-6 alpha chain | 1C06_HUMAN  | 41 kDa  | 0.75±0.96 | 0.50±0.58 | 0         | 0.181 | ∞    |
| Interleukin-6 receptor subunit beta                      | IL6RB_HUMAN | 104 kDa | 0         | 0.50±0.58 | 0         | 0.181 | ∞    |
| N-acetylglucosamine-6-sulfatase                          | GNS_HUMAN   | 62 kDa  | 0         | 0.50±0.58 | 0         | 0.181 | ∞    |
| Neuropilin-1                                             | NRP1_HUMAN  | 103 kDa | 0         | 0.50±0.58 | 0         | 0.181 | ∞    |
| Nuclease-sensitive element-binding protein 1             | YBOX1_HUMAN | 36 kDa  | 2.25±0.96 | 0.50±1.00 | 0         | 0.453 | ∞    |
| Podocalyxin-like protein 1                               | PODXL_HUMAN | 59 kDa  | 0         | 0.50±0.58 | 0         | 0.181 | ∞    |
| Polypeptide N-acetylgalactosaminyltransferase 1          | GALT1_HUMAN | 64 kDa  | 0         | 0.50±0.58 | 0         | 0.181 | ∞    |
| Putative phospholipase B-like 2                          | PLBL2_HUMAN | 65 kDa  | 0         | 0.50±0.58 | 0         | 0.181 | ∞    |
| Roundabout homolog 4                                     | ROBO4_HUMAN | 107 kDa | 0.25±0.50 | 0.50±0.58 | 0         | 0.181 | ∞    |
| Spectrin alpha chain, non-erythrocytic 1                 | SPTN1_HUMAN | 285 kDa | 0.25±0.50 | 0.50±0.58 | 0.25±0.50 | 0.608 | 2.00 |
| Urokinase plasminogen activator surface receptor         | UPAR_HUMAN  | 37 kDa  | 0         | 0.50±0.58 | 0         | 0.181 | ∞    |
| Vascular endothelial growth factor receptor 2            | VGFR2_HUMAN | 152 kDa | 0         | 0.50±0.58 | 0         | 0.181 | ∞    |
| 40S ribosomal protein S12                                | RS12_HUMAN  | 15 kDa  | 1.00±0.82 | 0.25±0.50 | 0         | 0.453 | ∞    |
| 40S ribosomal protein S18                                | RS18_HUMAN  | 18 kDa  | 1.75±0.50 | 0.25±0.50 | 0         | 0.453 | ∞    |
| 40S ribosomal protein S30                                | RS30_HUMAN  | 7 kDa   | 0.25±0.50 | 0.25±0.50 | 0         | 0.453 | ∞    |
| CD166 antigen                                            | CD166_HUMAN | 65 kDa  | 0.75±0.50 | 0.25±0.50 | 0         | 0.453 | ∞    |
| Eukaryotic translation initiation factor 2 subunit 1     | IF2A_HUMAN  | 36 kDa  | 0.50±0.58 | 0.25±0.50 | 0         | 0.453 | ∞    |
| Glucosidase 2 subunit beta                               | GLU2B_HUMAN | 59 kDa  | 1.00±0.82 | 0.25±0.50 | 0         | 0.453 | ∞    |
| Hemoglobin subunit beta                                  | HBB_HUMAN   | 16 kDa  | 0.50±0.58 | 0.25±0.50 | 0         | 0.453 | ∞    |
| Histone H1.5                                             | H15_HUMAN   | 23 kDa  | 1.00±1.41 | 0.25±0.50 | 0         | 0.453 | ∞    |
| Laminin subunit beta-1                                   | LAMB1_HUMAN | 198 kDa | 0.25±0.50 | 0.25±0.50 | 0         | 0.453 | ∞    |
| Laminin subunit gamma-1                                  | LAMC1_HUMAN | 178 kDa | 0.50±0.58 | 0.25±0.50 | 0         | 0.453 | ∞    |

|                                                                            |             |        |             |           |            |       |      |
|----------------------------------------------------------------------------|-------------|--------|-------------|-----------|------------|-------|------|
| Proteasome subunit alpha type-4                                            | PSA4_HUMAN  | 29 kDa | 0.75±0.96   | 0.25±0.50 | 0          | 0.453 | ∞    |
| <b>Proteins enriched in Flow-Through compared to Glycoprotein fraction</b> |             |        |             |           |            |       |      |
| Alpha-enolase                                                              | ENOA_HUMAN  | 47 kDa | 16.00±2.71  | 0         | 14.50±3.42 | 0.021 | 0    |
| Annexin A2                                                                 | ANXA2_HUMAN | 39 kDa | 14.00±4.32  | 0.50±0.58 | 11.00±3.46 | 0.027 | 0.05 |
| Vimentin                                                                   | VIME_HUMAN  | 54 kDa | 26.75±10.44 | 9.00±2.94 | 9.50±1.29  | 1     | 0.95 |
| Interstitial collagenase                                                   | MMP1_HUMAN  | 54 kDa | 12.00±4.97  | 0         | 8.50±3.70  | 0.021 | 0    |
| Tubulin alpha-1B chain                                                     | TBA1B_HUMAN | 50 kDa | 6.25±0.50   | 0.25±0.50 | 7.25±3.30  | 0.027 | 0.03 |
| Glyceraldehyde-3-phosphate dehydrogenase                                   | G3P_HUMAN   | 36 kDa | 15.50±3.11  | 0.25±0.50 | 7.00±1.83  | 0.027 | 0.04 |
| Cofilin-1                                                                  | COF1_HUMAN  | 19 kDa | 7.50±2.52   | 0         | 7.00±2.16  | 0.021 | 0    |
| Actin, cytoplasmic 1                                                       | ACTB_HUMAN  | 42 kDa | 28.25±7.32  | 2.00±1.41 | 6.75±0.96  | 0.028 | 0.30 |
| Elongation factor 2                                                        | EF2_HUMAN   | 95 kDa | 6.50±3.11   | 0         | 6.50±4.04  | 0.021 | 0    |
| Elongation factor 1-alpha 1                                                | EF1A1_HUMAN | 50 kDa | 14.75±3.20  | 0.50±0.58 | 6.25±2.87  | 0.027 | 0.08 |
| Annexin A1                                                                 | ANXA1_HUMAN | 39 kDa | 8.25±2.99   | 0         | 6.00±3.16  | 0.021 | 0    |
| Moesin                                                                     | MOES_HUMAN  | 68 kDa | 9.25±0.96   | 0         | 6.00±4.55  | 0.021 | 0    |
| Endothelial protein C receptor                                             | EPCR_HUMAN  | 27 kDa | 2.75±0.96   | 2.75±1.71 | 5.75±0.50  | 0.037 | 0.48 |
| Tubulin beta chain                                                         | TBB5_HUMAN  | 50 kDa | 13.00±3.37  | 0         | 5.50±1.29  | 0.021 | 0    |
| Heat shock cognate 71 kDa protein                                          | HSP7C_HUMAN | 71 kDa | 13.25±3.77  | 0.50±1.00 | 4.00±2.71  | 0.036 | 0.13 |
| Nucleolin                                                                  | NUCL_HUMAN  | 77 kDa | 4.00±0.82   | 0         | 3.50±3.11  | 0.069 | 0    |
| Peroxiredoxin-2                                                            | PRDX2_HUMAN | 22 kDa | 0           | 0         | 3.50±1.29  | 0.021 | 0    |
| Heat shock protein HSP 90-alpha                                            | HS90A_HUMAN | 85 kDa | 11.00±3.37  | 2.00±0.82 | 3.25±2.50  | 0.620 | 0.62 |
| Peptidyl-prolyl cis-trans isomerase A                                      | PPIA_HUMAN  | 18 kDa | 3.25±1.50   | 0         | 3.25±1.26  | 0.020 | 0    |
| Profilin-1                                                                 | PROF1_HUMAN | 15 kDa | 5.00±1.41   | 0         | 3.25±0.50  | 0.018 | 0    |
| Galectin-1                                                                 | LEG1_HUMAN  | 15 kDa | 8.75±1.71   | 0         | 3.00±1.63  | 0.020 | 0    |
| Rab GDP dissociation inhibitor beta                                        | GDIβ_HUMAN  | 51 kDa | 0.50±1.00   | 0         | 3.00±2.16  | 0.021 | 0    |
| Purine nucleoside phosphorylase                                            | PNPH_HUMAN  | 32 kDa | 0           | 0         | 2.75±1.50  | 0.020 | 0    |
| Heterogeneous nuclear ribonucleoproteins A2/B1                             | ROA2_HUMAN  | 37 kDa | 3.25±1.26   | 0         | 2.50±0.58  | 0.019 | 0    |

|                                                  |             |         |            |           |           |       |      |
|--------------------------------------------------|-------------|---------|------------|-----------|-----------|-------|------|
| Polypyrimidine tract-binding protein 1           | PTBP1_HUMAN | 57 kDa  | 0          | 0         | 2.50±1.91 | 0.067 | 0    |
| Protein disulfide-isomerase A3                   | PDIA3_HUMAN | 57 kDa  | 1.75±0.96  | 0.50±0.58 | 2.25±1.26 | 0.052 | 0.22 |
| Fructose-bisphosphate aldolase A                 | ALDOA_HUMAN | 39 kDa  | 6.50±2.52  | 0         | 2.25±2.06 | 0.067 | 0    |
| GTP-binding nuclear protein Ran                  | RAN_HUMAN   | 24 kDa  | 1.00±1.41  | 0         | 2.25±0.96 | 0.020 | 0    |
| Ubiquitin-like modifier-activating enzyme 1      | UBA1_HUMAN  | 118 kDa | 1.25±0.96  | 0         | 2.25±1.26 | 0.020 | 0    |
| SPARC                                            | SPRC_HUMAN  | 35 kDa  | 1.75±0.96  | 1.50±1.29 | 2.00±0.00 | 0.620 | 0.75 |
| Pyruvate kinase isozymes M1/M2                   | KPYM_HUMAN  | 58 kDa  | 11.50±2.08 | 0         | 2.00±0.82 | 0.020 | 0    |
| 14-3-3 protein zeta/delta                        | 1433Z_HUMAN | 28 kDa  | 6.75±1.89  | 1.50±1.29 | 1.75±0.50 | 0.877 | 0.86 |
| Protein-glutamine gamma-glutamyltransferase 2    | TGM2_HUMAN  | 77 kDa  | 2.75±1.71  | 1.00±0.82 | 1.75±1.26 | 0.369 | 0.57 |
| Ubiquitin carboxyl-terminal hydrolase isozyme L1 | UCHL1_HUMAN | 25 kDa  | 2.25±2.63  | 0         | 1.75±1.50 | 0.018 | 0    |
| WD repeat-containing protein 1                   | WDR1_HUMAN  | 66 kDa  | 2.25±1.26  | 0         | 1.75±0.96 | 0.020 | 0    |
| Nucleoside diphosphate kinase B                  | NDKB_HUMAN  | 17 kDa  | 3.25±0.96  | 0         | 1.75±1.50 | 0.018 | 0    |
| Phosphoglycerate kinase 1                        | PGK1_HUMAN  | 45 kDa  | 3.00±0.82  | 0         | 1.75±1.26 | 0.067 | 0    |
| 72 kDa type IV collagenase                       | MMP2_HUMAN  | 74 kDa  | 1.50±0.58  | 0         | 1.75±0.96 | 0.020 | 0    |
| Cystatin-C                                       | CYTC_HUMAN  | 16 kDa  | 1.00±0.00  | 0         | 1.75±0.50 | 0.018 | 0    |
| Filamin-B                                        | FLNB_HUMAN  | 278 kDa | 10.00±2.94 | 0.75±1.50 | 1.50±0.58 | 0.294 | 0.50 |
| Fascin                                           | FSCN1_HUMAN | 55 kDa  | 2.75±2.22  | 0         | 1.50±1.29 | 0.069 | 0    |
| Thymosin beta-10                                 | TYB10_HUMAN | 5 kDa   | 3.00±1.15  | 0         | 1.50±1.00 | 0.060 | 0    |
| Lupus La protein                                 | LA_HUMAN    | 47 kDa  | 0.50±0.58  | 0         | 1.50±1.00 | 0.018 | 0    |
| Clathrin heavy chain 1                           | CLH1_HUMAN  | 192 kDa | 1.75±1.26  | 0         | 1.25±0.96 | 0.067 | 0    |
| Protein DJ-1                                     | PARK7_HUMAN | 20 kDa  | 1.25±1.26  | 0         | 1.25±1.50 | 0.186 | 0    |
| Eukaryotic translation initiation factor 5A-1    | IF5A1_HUMAN | 17 kDa  | 1.00±0.82  | 0         | 1.25±0.96 | 0.067 | 0    |
| Peroxiredoxin-6                                  | PRDX6_HUMAN | 25 kDa  | 1.00±0.82  | 0         | 1.25±1.89 | 0.186 | 0    |
| Follistatin-related protein 1                    | FSTL1_HUMAN | 35 kDa  | 0.75±0.96  | 0.75±0.50 | 1.00±0.82 | 0.739 | 0.75 |
| Proteasome subunit alpha type-2                  | PSA2_HUMAN  | 26 kDa  | 0          | 0.50±0.58 | 1.00±1.41 | 0.874 | 0.50 |
| Dynein heavy chain 8, axonemal                   | DYH8_HUMAN  | 515 kDa | 1.00±0.82  | 0.25±0.50 | 1.00±0.00 | 0.060 | 0.25 |
| Proteasome subunit beta type-3                   | PSB3_HUMAN  | 23 kDa  | 0          | 0.25±0.50 | 1.00±1.15 | 0.405 | 0.25 |

|                                                                                   |             |         |           |           |           |       |      |
|-----------------------------------------------------------------------------------|-------------|---------|-----------|-----------|-----------|-------|------|
| Nucleophosmin                                                                     | NPM_HUMAN   | 33 kDa  | 1.50±1.29 | 0         | 1.00±1.15 | 0.181 | 0    |
| Actin-related protein 2/3 complex subunit 4                                       | ARPC4_HUMAN | 20 kDa  | 0.50±1.00 | 0         | 1.00±0.82 | 0.067 | 0.62 |
| 60 kDa heat shock protein, mitochondrial                                          | CH60_HUMAN  | 61 kDa  | 2.75±0.96 | 0         | 1.00±0.00 | 0.013 | 0    |
| L-lactate dehydrogenase A chain                                                   | LDHA_HUMAN  | 37 kDa  | 3.50±0.58 | 0         | 1.00±0.82 | 0.067 | 0    |
| Vinculin                                                                          | VINC_HUMAN  | 124 kDa | 0.25±0.50 | 0         | 1.00±1.41 | 0.186 | 0    |
| 14-3-3 protein epsilon                                                            | 1433E_HUMAN | 29 kDa  | 2.00±0.82 | 0.50±0.58 | 0.75±0.50 | 0.608 | 0.67 |
| 40S ribosomal protein S5                                                          | RS5_HUMAN   | 23 kDa  | 0.75±0.50 | 0.50±1.00 | 0.75±1.50 | 1     | 0.67 |
| Protein disulfide-isomerase A6                                                    | PDIA6_HUMAN | 48 kDa  | 0.25±0.50 | 0.50±0.58 | 0.75±0.96 | 0.874 | 0.67 |
| Heterogeneous nuclear ribonucleoprotein A1                                        | ROA1_HUMAN  | 39 kDa  | 7.00±4.55 | 0         | 0.75±0.96 | 0.186 | 0    |
| Peroxiredoxin-1                                                                   | PRDX1_HUMAN | 22 kDa  | 6.50±2.65 | 0         | 0.75±0.96 | 0.186 | 0    |
| Heat shock 70 kDa protein 4                                                       | HSP74_HUMAN | 94 kDa  | 1.00±0.82 | 0         | 0.75±0.96 | 0.186 | 0    |
| NEDD8                                                                             | NEDD8_HUMAN | 9 kDa   | 1.00±0.82 | 0         | 0.75±0.96 | 0.186 | 0    |
| Heat shock protein 105 kDa                                                        | HS105_HUMAN | 97 kDa  | 1.50±0.58 | 0         | 0.75±0.96 | 0.186 | 0    |
| Thioredoxin                                                                       | THIO_HUMAN  | 12 kDa  | 0.50±0.58 | 0         | 0.75±0.96 | 0.186 | 0    |
| Myosin regulatory light chain 12A                                                 | ML12A_HUMAN | 20 kDa  | 1.75±0.50 | 0         | 0.75±0.50 | 0.060 | 0    |
| Transitional endoplasmic reticulum ATPase                                         | TERA_HUMAN  | 89 kDa  | 1.75±0.50 | 0         | 0.75±0.96 | 0.186 | 0    |
| Cytoplasmic dynein 1 heavy chain 1                                                | DYHC1_HUMAN | 532 kDa | 0.25±0.50 | 0         | 0.75±1.50 | 0.453 | 0    |
| Adenylosuccinate synthetase isozyme 2                                             | PURA2_HUMAN | 50 kDa  | 0.25±0.50 | 0         | 0.75±1.50 | 0.453 | 0    |
| Hepatoma-derived growth factor                                                    | HDGF_HUMAN  | 27 kDa  | 0         | 0         | 0.75±0.96 | 0.186 | 0    |
| Nuclear autoantigenic sperm protein                                               | NASP_HUMAN  | 85 kDa  | 0         | 0         | 0.75±0.50 | 0.060 | 0    |
| Aminopeptidase B                                                                  | AMPB_HUMAN  | 73 kDa  | 0         | 0         | 0.75±0.96 | 0.186 | 0    |
| Serine/threonine-protein phosphatase 2A 65 kDa regulatory subunit A alpha isoform | 2AAA_HUMAN  | 65 kDa  | 0         | 0         | 0.75±0.96 | 0.186 | 0    |
| Heterogeneous nuclear ribonucleoprotein F                                         | HNRPF_HUMAN | 46 kDa  | 0         | 0         | 0.75±0.50 | 0.060 | 0    |
| Adenylate kinase isoenzyme 1                                                      | KAD1_HUMAN  | 22 kDa  | 0         | 0         | 0.75±0.96 | 0.186 | 0    |
| Ubiquitin thioesterase OTUB1                                                      | OTUB1_HUMAN | 31 kDa  | 0         | 0         | 0.75±0.50 | 0.060 | 0    |
| Glycyl-tRNA synthetase                                                            | SYG_HUMAN   | 83 kDa  | 0         | 0         | 0.75±0.96 | 0.186 | 0    |

|                                                                      |             |         |            |           |           |       |      |
|----------------------------------------------------------------------|-------------|---------|------------|-----------|-----------|-------|------|
| Tubulin alpha-1A chain                                               | TBA1A_HUMAN | 50 kDa  | 0          | 0         | 0.75±0.50 | 0.060 | 0    |
| 40S ribosomal protein S15a                                           | RS15A_HUMAN | 15 kDa  | 0.75±0.96  | 0.50±0.58 | 0.50±0.58 | 1     | 1    |
| Glutamate dehydrogenase 1, mitochondrial                             | DHE3_HUMAN  | 61 kDa  | 0          | 0.50±0.58 | 0.50±1.00 | 0.868 | 1    |
| 60S ribosomal protein L9                                             | RL9_HUMAN   | 22 kDa  | 0.50±0.58  | 0.25±0.50 | 0.50±0.58 | 0.608 | 0.50 |
| Spectrin beta chain, brain 1                                         | SPTB2_HUMAN | 275 kDa | 0.75±0.50  | 0.25±0.50 | 0.50±0.58 | 0.608 | 0.50 |
| Hemoglobin subunit alpha                                             | HBA_HUMAN   | 15 kDa  | 2.00±0.00  | 0.25±0.50 | 0.50±0.58 | 0.608 | 0.50 |
| Basement membrane-specific heparan sulfate proteoglycan core protein | PGBM_HUMAN  | 469 kDa | 20.75±7.23 | 0         | 0.50±0.58 | 0.181 | 0    |
| Heterogeneous nuclear ribonucleoprotein K                            | HNRPK_HUMAN | 51 kDa  | 4.00±1.83  | 0         | 0.50±0.58 | 0.181 | 0    |
| Lamin-A/C                                                            | LMNA_HUMAN  | 74 kDa  | 8.75±1.26  | 0         | 0.50±0.58 | 0.181 | 0    |
| Glutathione S-transferase P                                          | GSTP1_HUMAN | 23 kDa  | 1.75±0.96  | 0         | 0.50±0.58 | 0.181 | 0    |
| 60S ribosomal protein L12                                            | RL12_HUMAN  | 18 kDa  | 1.75±0.96  | 0         | 0.50±0.58 | 0.181 | 0    |
| Heterogeneous nuclear ribonucleoprotein D0                           | HNRPD_HUMAN | 38 kDa  | 1.25±0.96  | 0         | 0.50±1.00 | 0.453 | 0    |
| T-complex protein 1 subunit theta                                    | TCPQ_HUMAN  | 60 kDa  | 3.00±0.82  | 0         | 0.50±0.58 | 0.181 | 0    |
| Septin-2                                                             | SEPT2_HUMAN | 41 kDa  | 1.00±0.82  | 0         | 0.50±0.58 | 0.181 | 0    |
| Ribonuclease inhibitor                                               | RINI_HUMAN  | 50 kDa  | 1.00±0.82  | 0         | 0.50±0.58 | 0.181 | 0    |
| Eukaryotic initiation factor 4A-I                                    | IF4A1_HUMAN | 46 kDa  | 1.50±0.58  | 0         | 0.50±0.58 | 0.181 | 0    |
| Gamma-enolase                                                        | ENOG_HUMAN  | 47 kDa  | 0.50±0.58  | 0         | 0.50±0.58 | 0.181 | 0    |
| ADP-ribosylation factor 4                                            | ARF4_HUMAN  | 21 kDa  | 0.50±0.58  | 0         | 0.50±1.00 | 0.453 | 0    |
| Adenylyl cyclase-associated protein 1                                | CAP1_HUMAN  | 52 kDa  | 0.50±0.58  | 0         | 0.50±0.58 | 0.181 | 0    |
| Elongation factor 1-gamma                                            | EF1G_HUMAN  | 50 kDa  | 0.50±0.58  | 0         | 0.50±0.58 | 0.181 | 0    |
| S-formylglutathione hydrolase                                        | ESTD_HUMAN  | 31 kDa  | 0.50±0.58  | 0         | 0.50±0.58 | 0.181 | 0    |
| Trifunctional purine biosynthetic protein adenosine-3                | PUR2_HUMAN  | 108 kDa | 0.50±0.58  | 0         | 0.50±0.58 | 0.181 | 0    |
| T-complex protein 1 subunit eta                                      | TCPH_HUMAN  | 59 kDa  | 0.50±0.58  | 0         | 0.50±1.00 | 0.453 | 0    |
| High mobility group protein B1                                       | HMGB1_HUMAN | 25 kDa  | 3.25±0.50  | 0         | 0.50±1.00 | 0.453 | 0    |
| Heterogeneous nuclear ribonucleoprotein H                            | HNRH1_HUMAN | 49 kDa  | 3.25±0.50  | 0         | 0.50±0.58 | 0.181 | 0    |
| Reticulon-4                                                          | RTN4_HUMAN  | 130 kDa | 0.75±0.50  | 0         | 0.50±0.58 | 0.181 | 0    |

|                                                                         |             |         |           |   |           |       |   |
|-------------------------------------------------------------------------|-------------|---------|-----------|---|-----------|-------|---|
| Cell division control protein 42 homolog                                | CDC42_HUMAN | 21 kDa  | 0.75±0.50 | 0 | 0.50±0.58 | 0.181 | 0 |
| Heterogeneous nuclear ribonucleoprotein H3                              | HNRH3_HUMAN | 37 kDa  | 0.25±0.50 | 0 | 0.50±0.58 | 0.181 | 0 |
| 26S proteasome non-ATPase regulatory subunit 1                          | PSMD1_HUMAN | 106 kDa | 0.25±0.50 | 0 | 0.50±0.58 | 0.181 | 0 |
| Synaptic vesicle membrane protein VAT-1 homolog                         | VAT1_HUMAN  | 42 kDa  | 0.25±0.50 | 0 | 0.50±0.58 | 0.181 | 0 |
| X-ray repair cross-complementing protein 5                              | XRCC5_HUMAN | 83 kDa  | 0.25±0.50 | 0 | 0.50±0.58 | 0.181 | 0 |
| Serpin B9                                                               | SPB9_HUMAN  | 42 kDa  | 0         | 0 | 0.50±0.58 | 0.181 | 0 |
| Gelsolin                                                                | GELS_HUMAN  | 86 kDa  | 0         | 0 | 0.50±0.58 | 0.181 | 0 |
| Annexin A4                                                              | ANXA4_HUMAN | 36 kDa  | 0         | 0 | 0.50±0.58 | 0.181 | 0 |
| Retinal dehydrogenase 1                                                 | AL1A1_HUMAN | 55 kDa  | 0         | 0 | 0.50±0.58 | 0.181 | 0 |
| Beta-actin-like protein 2                                               | ACTBL_HUMAN | 42 kDa  | 0         | 0 | 0.50±1.00 | 0.453 | 0 |
| ATP-citrate synthase                                                    | ACLY_HUMAN  | 121 kDa | 0         | 0 | 0.50±1.00 | 0.453 | 0 |
| Annexin A6                                                              | ANXA6_HUMAN | 76 kDa  | 0         | 0 | 0.50±0.58 | 0.181 | 0 |
| Actin-related protein 2/3 complex subunit 3                             | ARPC3_HUMAN | 21 kDa  | 0         | 0 | 0.50±0.58 | 0.181 | 0 |
| Coactosin-like protein                                                  | COTL1_HUMAN | 16 kDa  | 0         | 0 | 0.50±1.00 | 0.453 | 0 |
| Four and a half LIM domains protein 2                                   | FHL2_HUMAN  | 32 kDa  | 0         | 0 | 0.50±0.58 | 0.181 | 0 |
| Farnesyl pyrophosphate synthetase                                       | FPPS_HUMAN  | 48 kDa  | 0         | 0 | 0.50±0.58 | 0.181 | 0 |
| Isocitrate dehydrogenase [NADP] cytoplasmic                             | IDHC_HUMAN  | 47 kDa  | 0         | 0 | 0.50±0.58 | 0.181 | 0 |
| Eukaryotic translation initiation factor 1A, X-chromosomal              | IF1AX_HUMAN | 16 kDa  | 0         | 0 | 0.50±0.58 | 0.181 | 0 |
| BTB/POZ domain-containing protein KCTD12                                | KCD12_HUMAN | 36 kDa  | 0         | 0 | 0.50±1.00 | 0.453 | 0 |
| Malate dehydrogenase, mitochondrial                                     | MDHM_HUMAN  | 36 kDa  | 0         | 0 | 0.50±0.58 | 0.181 | 0 |
| Platelet-activating factor acetylhydrolase IB subunit beta              | PA1B2_HUMAN | 26 kDa  | 0         | 0 | 0.50±0.58 | 0.181 | 0 |
| Pyridoxal kinase                                                        | PDXK_HUMAN  | 35 kDa  | 0         | 0 | 0.50±0.58 | 0.181 | 0 |
| Serine/threonine-protein phosphatase 2A catalytic subunit alpha isoform | PP2AA_HUMAN | 36 kDa  | 0         | 0 | 0.50±0.58 | 0.181 | 0 |
| Presequence protease, mitochondrial                                     | PREP_HUMAN  | 117 kDa | 0         | 0 | 0.50±0.58 | 0.181 | 0 |
| 26S proteasome non-ATPase regulatory subunit 12                         | PSD12_HUMAN | 53 kDa  | 0         | 0 | 0.50±1.00 | 0.453 | 0 |
| Adenylosuccinate lyase                                                  | PUR8_HUMAN  | 55 kDa  | 0         | 0 | 0.50±0.58 | 0.181 | 0 |

|                                                          |              |         |             |           |           |       |   |
|----------------------------------------------------------|--------------|---------|-------------|-----------|-----------|-------|---|
| Bifunctional purine biosynthesis protein PURH            | PUR9_HUMAN   | 65 kDa  | 0           | 0         | 0.50±0.58 | 0.181 | 0 |
| Replication protein A 14 kDa subunit                     | RFA3_HUMAN   | 14 kDa  | 0           | 0         | 0.50±0.58 | 0.181 | 0 |
| Prostaglandin E synthase 3                               | TEBP_HUMAN   | 19 kDa  | 0           | 0         | 0.50±0.58 | 0.181 | 0 |
| Triosephosphate isomerase                                | TPIS_HUMAN   | 27 kDa  | 0           | 0         | 0.50±0.58 | 0.181 | 0 |
| Heat shock protein HSP 90-beta                           | HS90B_HUMAN  | 83 kDa  | 6.75±4.35   | 0.25±0.50 | 0.25±0.50 | 1     | 1 |
| Filamin-C                                                | FLNC_HUMAN   | 291 kDa | 3.75±1.89   | 0.25±0.50 | 0.25±0.50 | 1     | 1 |
| 14-3-3 protein theta                                     | 1433T_HUMAN  | 28 kDa  | 3.25±0.50   | 0.25±0.50 | 0.25±0.50 | 1     | 1 |
| Dihydropyrimidinase-related protein 2                    | DPYL2_HUMAN  | 62 kDa  | 1.75±0.50   | 0.25±0.50 | 0.25±0.50 | 1     | 1 |
| Laminin subunit alpha-4                                  | LAMA4_HUMAN  | 203 kDa | 0.25±0.50   | 0.25±0.50 | 0.25±0.50 | 1     | 1 |
| 40S ribosomal protein S24                                | RS24_HUMAN   | 15 kDa  | 0           | 0.25±0.50 | 0.25±0.50 | 1     | 1 |
| Myosin-9                                                 | MYH9_HUMAN   | 227 kDa | 30.25±11.41 | 0         | 0.25±0.50 | 0.453 | 0 |
| Major vault protein                                      | MVP_HUMAN    | 99 kDa  | 3.50±2.38   | 0         | 0.25±0.50 | 0.453 | 0 |
| Thymosin beta-4                                          | TYB4_HUMAN   | 5 kDa   | 6.25±2.22   | 0         | 0.25±0.50 | 0.453 | 0 |
| Plectin                                                  | PLEC_HUMAN   | 532 kDa | 2.00±1.41   | 0         | 0.25±0.50 | 0.453 | 0 |
| Actin-related protein 2/3 complex subunit 1B             | ARC1B_HUMAN  | 41 kDa  | 1.00±1.41   | 0         | 0.25±0.50 | 0.453 | 0 |
| Talin-1                                                  | TLN1_HUMAN   | 270 kDa | 3.50±1.29   | 0         | 0.25±0.50 | 0.453 | 0 |
| Stress-70 protein, mitochondrial                         | GRP75_HUMAN  | 74 kDa  | 1.50±1.29   | 0         | 0.25±0.50 | 0.453 | 0 |
| Cellular nucleic acid-binding protein                    | CNBP_HUMAN   | 19 kDa  | 0.50±1.00   | 0         | 0.25±0.50 | 0.453 | 0 |
| Peptidyl-prolyl cis-trans isomerase FKBP1A               | FKBP1A_HUMAN | 12 kDa  | 1.25±0.96   | 0         | 0.25±0.50 | 0.453 | 0 |
| Plasminogen activator inhibitor 1 RNA-binding protein    | PAIRB_HUMAN  | 45 kDa  | 1.25±0.96   | 0         | 0.25±0.50 | 0.453 | 0 |
| Elongation factor 1-beta                                 | EF1B_HUMAN   | 25 kDa  | 1.00±0.82   | 0         | 0.25±0.50 | 0.453 | 0 |
| Heterogeneous nuclear ribonucleoprotein Q                | HNRPQ_HUMAN  | 70 kDa  | 1.00±0.82   | 0         | 0.25±0.50 | 0.453 | 0 |
| Transgelin-2                                             | TAGL2_HUMAN  | 22 kDa  | 1.00±0.82   | 0         | 0.25±0.50 | 0.453 | 0 |
| Myosin light polypeptide 6                               | MYL6_HUMAN   | 17 kDa  | 3.50±0.58   | 0         | 0.25±0.50 | 0.453 | 0 |
| Phosphoserine aminotransferase                           | SERC_HUMAN   | 40 kDa  | 0.50±0.58   | 0         | 0.25±0.50 | 0.453 | 0 |
| Chloride intracellular channel protein 4                 | CLIC4_HUMAN  | 29 kDa  | 0.50±0.58   | 0         | 0.25±0.50 | 0.453 | 0 |
| Guanine nucleotide-binding protein G(i), alpha-2 subunit | GNAI2_HUMAN  | 40 kDa  | 0.50±0.58   | 0         | 0.25±0.50 | 0.453 | 0 |

|                                                     |              |         |            |   |           |       |   |
|-----------------------------------------------------|--------------|---------|------------|---|-----------|-------|---|
| Polyadenylate-binding protein 1                     | PABP1_HUMAN  | 71 kDa  | 0.50±0.58  | 0 | 0.25±0.50 | 0.453 | 0 |
| T-complex protein 1 subunit epsilon                 | TCPE_HUMAN   | 60 kDa  | 0.50±0.58  | 0 | 0.25±0.50 | 0.453 | 0 |
| Cytoplasmic dynein 1 intermediate chain 2           | DC1I2_HUMAN  | 71 kDa  | 0.75±0.50  | 0 | 0.25±0.50 | 0.453 | 0 |
| Fatty acid synthase                                 | FAS_HUMAN    | 273 kDa | 0.75±0.50  | 0 | 0.25±0.50 | 0.453 | 0 |
| Heat shock 70 kDa protein 1L                        | HS71L_HUMAN  | 70 kDa  | 0.25±0.50  | 0 | 0.25±0.50 | 0.453 | 0 |
| Plastin-3                                           | PLST_HUMAN   | 71 kDa  | 0.25±0.50  | 0 | 0.25±0.50 | 0.453 | 0 |
| Parathymsin                                         | PTMS_HUMAN   | 12 kDa  | 0.25±0.50  | 0 | 0.25±0.50 | 0.453 | 0 |
| Signal recognition particle 14 kDa protein          | SRP14_HUMAN  | 15 kDa  | 0.25±0.50  | 0 | 0.25±0.50 | 0.453 | 0 |
| T-complex protein 1 subunit beta                    | TCPB_HUMAN   | 57 kDa  | 0.25±0.50  | 0 | 0.25±0.50 | 0.453 | 0 |
| Glucose-6-phosphate 1-dehydrogenase                 | G6PD_HUMAN   | 59 kDa  | 1.00±0.00  | 0 | 0.25±0.50 | 0.453 | 0 |
| <b>Proteins detected in Input only</b>              |              |         |            |   |           |       |   |
| Filamin-A                                           | FLNA_HUMAN   | 281 kDa | 16.25±6.85 | 0 | 0         | -     | - |
| Neuroblast differentiation-associated protein AHNAK | AHNAK_HUMAN  | 629 kDa | 9.50±4.51  | 0 | 0         | -     | - |
| Chloride intracellular channel protein 1            | CLIC1_HUMAN  | 27 kDa  | 4.25±0.96  | 0 | 0         | -     | - |
| Amyloid beta A4 protein                             | A4_HUMAN     | 87 kDa  | 3.75±1.50  | 0 | 0         | -     | - |
| High mobility group protein HMG-I/HMG-Y             | HMGA1_HUMAN  | 12 kDa  | 3.25±1.50  | 0 | 0         | -     | - |
| 60S ribosomal protein L15                           | RL15_HUMAN   | 24 kDa  | 3.25±0.50  | 0 | 0         | -     | - |
| 40S ribosomal protein S8                            | RS8_HUMAN    | 24 kDa  | 3.25±0.96  | 0 | 0         | -     | - |
| Rho GDP-dissociation inhibitor 1                    | GDIR1_HUMAN  | 23 kDa  | 3.00±0.82  | 0 | 0         | -     | - |
| Multimerin-1                                        | MMRN1_HUMAN  | 138 kDa | 3.00±2.00  | 0 | 0         | -     | - |
| Metallothionein-2                                   | MT2_HUMAN    | 6 kDa   | 3.00±1.41  | 0 | 0         | -     | - |
| 40S ribosomal protein S16                           | RS16_HUMAN   | 16 kDa  | 3.00±0.82  | 0 | 0         | -     | - |
| Protein S100-A6                                     | S100A6_HUMAN | 10 kDa  | 3.00±1.41  | 0 | 0         | -     | - |
| 60S ribosomal protein L18                           | RL18_HUMAN   | 22 kDa  | 2.75±1.26  | 0 | 0         | -     | - |
| 60S ribosomal protein L5                            | RL5_HUMAN    | 34 kDa  | 2.75±0.50  | 0 | 0         | -     | - |
| 60S ribosomal protein L7a                           | RL7A_HUMAN   | 30 kDa  | 2.75±1.50  | 0 | 0         | -     | - |

|                                                      |             |         |           |   |   |   |   |
|------------------------------------------------------|-------------|---------|-----------|---|---|---|---|
| Heat shock protein beta-1                            | HSPB1_HUMAN | 23 kDa  | 2.50±0.58 | 0 | 0 | - | - |
| L-lactate dehydrogenase B chain                      | LDHB_HUMAN  | 37 kDa  | 2.50±1.00 | 0 | 0 | - | - |
| 60S ribosomal protein L13a                           | RL13A_HUMAN | 24 kDa  | 2.25±0.50 | 0 | 0 | - | - |
| 60S ribosomal protein L3                             | RL3_HUMAN   | 46 kDa  | 2.25±0.50 | 0 | 0 | - | - |
| 60S ribosomal protein L4                             | RL4_HUMAN   | 48 kDa  | 2.25±1.26 | 0 | 0 | - | - |
| Splicing factor, proline- and glutamine-rich         | SFPQ_HUMAN  | 76 kDa  | 2.25±1.50 | 0 | 0 | - | - |
| Polymerase I and transcript release factor           | PTRF_HUMAN  | 43 kDa  | 2.00±0.82 | 0 | 0 | - | - |
| 60S ribosomal protein L13                            | RL13_HUMAN  | 24 kDa  | 2.00±1.63 | 0 | 0 | - | - |
| 60S ribosomal protein L30                            | RL30_HUMAN  | 13 kDa  | 2.00±0.00 | 0 | 0 | - | - |
| 60S ribosomal protein L6                             | RL6_HUMAN   | 33 kDa  | 2.00±1.63 | 0 | 0 | - | - |
| 40S ribosomal protein S4, X isoform                  | RS4X_HUMAN  | 30 kDa  | 2.00±1.15 | 0 | 0 | - | - |
| 14-3-3 protein gamma                                 | 1433G_HUMAN | 28 kDa  | 1.75±0.96 | 0 | 0 | - | - |
| Probable ATP-dependent RNA helicase DDX17            | DDX17_HUMAN | 72 kDa  | 1.75±0.50 | 0 | 0 | - | - |
| Heterogeneous nuclear ribonucleoproteins C1/C2       | HNRPC_HUMAN | 34 kDa  | 1.75±0.50 | 0 | 0 | - | - |
| Microtubule-associated protein 4                     | MAP4_HUMAN  | 121 kDa | 1.75±0.50 | 0 | 0 | - | - |
| Phosphoglycerate mutase 1                            | PGAM1_HUMAN | 29 kDa  | 1.75±1.26 | 0 | 0 | - | - |
| 60S acidic ribosomal protein P0-like                 | RLA0L_HUMAN | 34 kDa  | 1.75±0.50 | 0 | 0 | - | - |
| 40S ribosomal protein S13                            | RS13_HUMAN  | 17 kDa  | 1.75±0.50 | 0 | 0 | - | - |
| Far upstream element-binding protein 2               | FUBP2_HUMAN | 73 kDa  | 1.50±1.00 | 0 | 0 | - | - |
| Histone H2B type 1-B                                 | H2B1B_HUMAN | 14 kDa  | 1.50±3.00 | 0 | 0 | - | - |
| Nascent polypeptide-associated complex subunit alpha | NACA_HUMAN  | 23 kDa  | 1.50±0.58 | 0 | 0 | - | - |
| Prothymosin alpha                                    | PTMA_HUMAN  | 12 kDa  | 1.50±1.00 | 0 | 0 | - | - |
| 60S ribosomal protein L27                            | RL27_HUMAN  | 16 kDa  | 1.50±0.58 | 0 | 0 | - | - |
| 40S ribosomal protein S23                            | RS23_HUMAN  | 16 kDa  | 1.50±1.29 | 0 | 0 | - | - |
| 40S ribosomal protein S6                             | RS6_HUMAN   | 29 kDa  | 1.50±1.91 | 0 | 0 | - | - |
| 40S ribosomal protein S9                             | RS9_HUMAN   | 23 kDa  | 1.50±1.00 | 0 | 0 | - | - |
| Protein SET                                          | SET_HUMAN   | 33 kDa  | 1.50±1.00 | 0 | 0 | - | - |

|                                                      |             |         |           |   |   |   |   |
|------------------------------------------------------|-------------|---------|-----------|---|---|---|---|
| Stathmin                                             | STMN1_HUMAN | 17 kDa  | 1.50±1.73 | 0 | 0 | - | - |
| 6-phosphogluconate dehydrogenase, decarboxylating    | 6PGD_HUMAN  | 53 kDa  | 1.25±0.96 | 0 | 0 | - | - |
| Apolipoprotein C-III                                 | APOC3_HUMAN | 11 kDa  | 1.25±0.50 | 0 | 0 | - | - |
| Brain acid soluble protein 1                         | BASP1_HUMAN | 23 kDa  | 1.25±0.96 | 0 | 0 | - | - |
| Caldesmon                                            | CALD1_HUMAN | 93 kDa  | 1.25±0.50 | 0 | 0 | - | - |
| Cysteine-rich protein 2                              | CRIP2_HUMAN | 22 kDa  | 1.25±0.96 | 0 | 0 | - | - |
| Heat shock 70 kDa protein 1                          | HSP71_HUMAN | 70 kDa  | 1.25±0.50 | 0 | 0 | - | - |
| Poly [ADP-ribose] polymerase 1                       | PARP1_HUMAN | 113 kDa | 1.25±0.50 | 0 | 0 | - | - |
| Poly(rC)-binding protein 1                           | PCBP1_HUMAN | 37 kDa  | 1.25±0.96 | 0 | 0 | - | - |
| Biglycan                                             | PGS1_HUMAN  | 42 kDa  | 1.25±1.26 | 0 | 0 | - | - |
| 60S ribosomal protein L21                            | RL21_HUMAN  | 19 kDa  | 1.25±0.50 | 0 | 0 | - | - |
| 60S ribosomal protein L27a                           | RL27A_HUMAN | 17 kDa  | 1.25±0.50 | 0 | 0 | - | - |
| 60S ribosomal protein L29                            | RL29_HUMAN  | 18 kDa  | 1.25±0.50 | 0 | 0 | - | - |
| 60S ribosomal protein L32                            | RL32_HUMAN  | 16 kDa  | 1.25±0.50 | 0 | 0 | - | - |
| 40S ribosomal protein S20                            | RS20_HUMAN  | 13 kDa  | 1.25±0.50 | 0 | 0 | - | - |
| SH3 domain-binding glutamic acid-rich-like protein 3 | SH3L3_HUMAN | 10 kDa  | 1.25±0.96 | 0 | 0 | - | - |
| Staphylococcal nuclease domain-containing protein 1  | SND1_HUMAN  | 102 kDa | 1.25±0.96 | 0 | 0 | - | - |
| Serine/arginine-rich splicing factor 1               | SRSF1_HUMAN | 28 kDa  | 1.25±0.50 | 0 | 0 | - | - |
| Stress-induced-phosphoprotein 1                      | STIP1_HUMAN | 63 kDa  | 1.25±0.96 | 0 | 0 | - | - |
| T-complex protein 1 subunit gamma                    | TCPG_HUMAN  | 61 kDa  | 1.25±0.96 | 0 | 0 | - | - |
| Thioredoxin domain-containing protein 17             | TXD17_HUMAN | 14 kDa  | 1.25±0.96 | 0 | 0 | - | - |
| Beta-2-microglobulin                                 | B2MG_HUMAN  | 14 kDa  | 1.00±0.82 | 0 | 0 | - | - |
| Clusterin                                            | CLUS_HUMAN  | 52 kDa  | 1.00±0.82 | 0 | 0 | - | - |
| Cysteine and glycine-rich protein 1                  | CSRP1_HUMAN | 21 kDa  | 1.00±0.82 | 0 | 0 | - | - |
| Elongation factor 1-delta                            | EF1D_HUMAN  | 31 kDa  | 1.00±0.82 | 0 | 0 | - | - |
| Fatty acid-binding protein, epidermal                | FABP5_HUMAN | 15 kDa  | 1.00±0.82 | 0 | 0 | - | - |
| 1,4-alpha-glucan-branching enzyme                    | GLGB_HUMAN  | 80 kDa  | 1.00±0.82 | 0 | 0 | - | - |

|                                                                   |             |         |           |   |   |   |   |
|-------------------------------------------------------------------|-------------|---------|-----------|---|---|---|---|
| Histone H4                                                        | H4_HUMAN    | 11 kDa  | 1.00±0.00 | 0 | 0 | - | - |
| Non-histone chromosomal protein HMG-17                            | HMGN2_HUMAN | 9 kDa   | 1.00±0.82 | 0 | 0 | - | - |
| Heterogeneous nuclear ribonucleoprotein D-like                    | HNRDL_HUMAN | 46 kDa  | 1.00±0.82 | 0 | 0 | - | - |
| Insulin-like growth factor-binding protein 2                      | IBP2_HUMAN  | 35 kDa  | 1.00±1.15 | 0 | 0 | - | - |
| 6-phosphofructokinase type C                                      | K6PP_HUMAN  | 86 kDa  | 1.00±1.15 | 0 | 0 | - | - |
| Ras-related protein Rab-1A                                        | RAB1A_HUMAN | 23 kDa  | 1.00±1.15 | 0 | 0 | - | - |
| 60S ribosomal protein L18a                                        | RL18A_HUMAN | 21 kDa  | 1.00±0.82 | 0 | 0 | - | - |
| 60S ribosomal protein L35a                                        | RL35A_HUMAN | 13 kDa  | 1.00±0.00 | 0 | 0 | - | - |
| 60S ribosomal protein L8                                          | RL8_HUMAN   | 28 kDa  | 1.00±0.82 | 0 | 0 | - | - |
| 40S ribosomal protein S3a                                         | RS3A_HUMAN  | 30 kDa  | 1.00±1.41 | 0 | 0 | - | - |
| Serine/arginine-rich splicing factor 6                            | SRSF6_HUMAN | 40 kDa  | 1.00±0.82 | 0 | 0 | - | - |
| Serine/arginine-rich splicing factor 7                            | SRSF7_HUMAN | 27 kDa  | 1.00±0.82 | 0 | 0 | - | - |
| Tubulin beta-4B chain                                             | TBB4B_HUMAN | 50 kDa  | 1.00±0.82 | 0 | 0 | - | - |
| T-complex protein 1 subunit delta                                 | TCPD_HUMAN  | 58 kDa  | 1.00±0.82 | 0 | 0 | - | - |
| THO complex subunit 4                                             | THOC4_HUMAN | 27 kDa  | 1.00±0.82 | 0 | 0 | - | - |
| Actin-related protein 2/3 complex subunit 2                       | ARPC2_HUMAN | 34 kDa  | 0.75±0.96 | 0 | 0 | - | - |
| Transcription factor BTF3                                         | BTF3_HUMAN  | 22 kDa  | 0.75±0.50 | 0 | 0 | - | - |
| Calpain-2 catalytic subunit                                       | CAN2_HUMAN  | 80 kDa  | 0.75±0.50 | 0 | 0 | - | - |
| F-actin-capping protein subunit beta                              | CAPZB_HUMAN | 31 kDa  | 0.75±0.96 | 0 | 0 | - | - |
| F-actin-capping protein subunit alpha-1                           | CAZA1_HUMAN | 33 kDa  | 0.75±0.96 | 0 | 0 | - | - |
| 10 kDa heat shock protein, mitochondrial                          | CH10_HUMAN  | 11 kDa  | 0.75±0.50 | 0 | 0 | - | - |
| Eukaryotic translation initiation factor 3 subunit C              | EIF3C_HUMAN | 105 kDa | 0.75±0.50 | 0 | 0 | - | - |
| Glutathione S-transferase omega-1                                 | GSTO1_HUMAN | 28 kDa  | 0.75±0.50 | 0 | 0 | - | - |
| Eukaryotic translation initiation factor 2 subunit 3-like protein | IF2GL_HUMAN | 51 kDa  | 0.75±0.50 | 0 | 0 | - | - |
| Eukaryotic translation initiation factor 4B                       | IF4B_HUMAN  | 69 kDa  | 0.75±0.50 | 0 | 0 | - | - |
| Eukaryotic translation initiation factor 6                        | IF6_HUMAN   | 27 kDa  | 0.75±0.96 | 0 | 0 | - | - |
| Microtubule-associated protein 1B                                 | MAP1B_HUMAN | 271 kDa | 0.75±0.50 | 0 | 0 | - | - |

|                                                             |             |         |           |   |   |   |   |
|-------------------------------------------------------------|-------------|---------|-----------|---|---|---|---|
| Non-POU domain-containing octamer-binding protein           | NONO_HUMAN  | 54 kDa  | 0.75±0.50 | 0 | 0 | - | - |
| Astrocytic phosphoprotein PEA-15                            | PEA15_HUMAN | 15 kDa  | 0.75±0.96 | 0 | 0 | - | - |
| Serine/threonine-protein phosphatase 4 regulatory subunit 4 | PP4R4_HUMAN | 99 kDa  | 0.75±0.96 | 0 | 0 | - | - |
| Ran-specific GTPase-activating protein                      | RANG_HUMAN  | 23 kDa  | 0.75±0.50 | 0 | 0 | - | - |
| Reticulocalbin-1                                            | RCN1_HUMAN  | 39 kDa  | 0.75±0.96 | 0 | 0 | - | - |
| Heterogeneous nuclear ribonucleoprotein A3                  | ROA3_HUMAN  | 40 kDa  | 0.75±0.50 | 0 | 0 | - | - |
| 40S ribosomal protein S17                                   | RS17_HUMAN  | 16 kDa  | 0.75±0.50 | 0 | 0 | - | - |
| Adenosylhomocysteinase                                      | SAHH_HUMAN  | 48 kDa  | 0.75±0.50 | 0 | 0 | - | - |
| Serine/arginine-rich splicing factor 3                      | SRSF3_HUMAN | 19 kDa  | 0.75±0.96 | 0 | 0 | - | - |
| Tubulin-specific chaperone A                                | TBCA_HUMAN  | 13 kDa  | 0.75±0.50 | 0 | 0 | - | - |
| Activated RNA polymerase II transcriptional coactivator p15 | TCP4_HUMAN  | 14 kDa  | 0.75±0.50 | 0 | 0 | - | - |
| T-complex protein 1 subunit zeta                            | TCPZ_HUMAN  | 58 kDa  | 0.75±0.96 | 0 | 0 | - | - |
| A-kinase anchor protein 12                                  | AKA12_HUMAN | 191 kDa | 0.50±0.58 | 0 | 0 | - | - |
| Amyloid-like protein 2                                      | APLP2_HUMAN | 87 kDa  | 0.50±1.00 | 0 | 0 | - | - |
| Carbonyl reductase [NADPH] 1                                | CBR1_HUMAN  | 30 kDa  | 0.50±0.58 | 0 | 0 | - | - |
| CD59 glycoprotein                                           | CD59_HUMAN  | 14 kDa  | 0.50±0.58 | 0 | 0 | - | - |
| CD9 antigen                                                 | CD9_HUMAN   | 25 kDa  | 0.50±0.58 | 0 | 0 | - | - |
| Cleavage and polyadenylation specificity factor subunit 5   | CPSF5_HUMAN | 26 kDa  | 0.50±1.00 | 0 | 0 | - | - |
| D-tyrosyl-tRNA(Tyr) deacylase 1                             | DTD1_HUMAN  | 23 kDa  | 0.50±0.58 | 0 | 0 | - | - |
| Spliceosome RNA helicase DDX39B                             | DX39B_HUMAN | 49 kDa  | 0.50±0.58 | 0 | 0 | - | - |
| Band 4.1-like protein 3                                     | E41L3_HUMAN | 121 kDa | 0.50±0.58 | 0 | 0 | - | - |
| Endothelial differentiation-related factor 1                | EDF1_HUMAN  | 16 kDa  | 0.50±0.58 | 0 | 0 | - | - |
| Eukaryotic translation initiation factor 3 subunit D        | EIF3D_HUMAN | 64 kDa  | 0.50±0.58 | 0 | 0 | - | - |
| Eukaryotic translation initiation factor 3 subunit L        | EIF3L_HUMAN | 67 kDa  | 0.50±0.58 | 0 | 0 | - | - |
| Ezrin                                                       | EZRI_HUMAN  | 69 kDa  | 0.50±0.58 | 0 | 0 | - | - |
| RNA-binding protein FUS                                     | FUS_HUMAN   | 53 kDa  | 0.50±0.58 | 0 | 0 | - | - |
| Histone H3.1t                                               | H31T_HUMAN  | 16 kDa  | 0.50±0.58 | 0 | 0 | - | - |

|                                                    |             |         |           |   |   |   |   |
|----------------------------------------------------|-------------|---------|-----------|---|---|---|---|
| Hematological and neurological expressed 1 protein | HN1_HUMAN   | 16 kDa  | 0.50±0.58 | 0 | 0 | - | - |
| Heterogeneous nuclear ribonucleoprotein L          | HNRPL_HUMAN | 64 kDa  | 0.50±0.58 | 0 | 0 | - | - |
| Heterogeneous nuclear ribonucleoprotein M          | HNRPM_HUMAN | 78 kDa  | 0.50±0.58 | 0 | 0 | - | - |
| Importin subunit alpha-2                           | IMA2_HUMAN  | 58 kDa  | 0.50±0.58 | 0 | 0 | - | - |
| Ras GTPase-activating-like protein IQGAP1          | IQGA1_HUMAN | 189 kDa | 0.50±0.58 | 0 | 0 | - | - |
| Inter-alpha-trypsin inhibitor heavy chain H2       | ITIH2_HUMAN | 106 kDa | 0.50±0.58 | 0 | 0 | - | - |
| LIM and SH3 domain protein 1                       | LASP1_HUMAN | 30 kDa  | 0.50±1.00 | 0 | 0 | - | - |
| Myristoylated alanine-rich C-kinase substrate      | MARCS_HUMAN | 32 kDa  | 0.50±0.58 | 0 | 0 | - | - |
| Proliferating cell nuclear antigen                 | PCNA_HUMAN  | 29 kDa  | 0.50±1.00 | 0 | 0 | - | - |
| Prefoldin subunit 2                                | PFD2_HUMAN  | 17 kDa  | 0.50±0.58 | 0 | 0 | - | - |
| Perilipin-3                                        | PLIN3_HUMAN | 47 kDa  | 0.50±1.00 | 0 | 0 | - | - |
| Peptidyl-prolyl cis-trans isomerase B              | PIPB_HUMAN  | 24 kDa  | 0.50±1.00 | 0 | 0 | - | - |
| DNA-dependent protein kinase catalytic subunit     | PRKDC_HUMAN | 469 kDa | 0.50±1.00 | 0 | 0 | - | - |
| 26S proteasome non-ATPase regulatory subunit 2     | PSMD2_HUMAN | 100 kDa | 0.50±1.00 | 0 | 0 | - | - |
| Ras-related protein Ral-A                          | RALA_HUMAN  | 24 kDa  | 0.50±0.58 | 0 | 0 | - | - |
| 60S ribosomal protein L14                          | RL14_HUMAN  | 23 kDa  | 0.50±0.58 | 0 | 0 | - | - |
| 60S ribosomal protein L19                          | RL19_HUMAN  | 23 kDa  | 0.50±0.58 | 0 | 0 | - | - |
| 60S ribosomal protein L23                          | RL23_HUMAN  | 15 kDa  | 0.50±0.58 | 0 | 0 | - | - |
| 60S ribosomal protein L24                          | RL24_HUMAN  | 18 kDa  | 0.50±0.58 | 0 | 0 | - | - |
| 60S ribosomal protein L28                          | RL28_HUMAN  | 16 kDa  | 0.50±0.58 | 0 | 0 | - | - |
| 60S ribosomal protein L38                          | RL38_HUMAN  | 8 kDa   | 0.50±1.00 | 0 | 0 | - | - |
| 60S ribosomal protein L7                           | RL7_HUMAN   | 29 kDa  | 0.50±1.00 | 0 | 0 | - | - |
| 40S ribosomal protein S27                          | RS27_HUMAN  | 9 kDa   | 0.50±0.58 | 0 | 0 | - | - |
| 40S ribosomal protein S4, Y isoform 1              | RS4Y1_HUMAN | 29 kDa  | 0.50±0.58 | 0 | 0 | - | - |
| 40S ribosomal protein S7                           | RS7_HUMAN   | 22 kDa  | 0.50±0.58 | 0 | 0 | - | - |
| U1 small nuclear ribonucleoprotein 70 kDa          | RU17_HUMAN  | 52 kDa  | 0.50±0.58 | 0 | 0 | - | - |
| Protein transport protein Sec23A                   | SC23A_HUMAN | 86 kDa  | 0.50±0.58 | 0 | 0 | - | - |

|                                        |             |        |           |   |   |   |   |
|----------------------------------------|-------------|--------|-----------|---|---|---|---|
| Splicing factor 1                      | SF01_HUMAN  | 68 kDa | 0.50±0.58 | 0 | 0 | - | - |
| Serine/arginine-rich splicing factor 2 | SRSF2_HUMAN | 25 kDa | 0.50±0.58 | 0 | 0 | - | - |
| Small ubiquitin-related modifier 2     | SUMO2_HUMAN | 11 kDa | 0.50±0.58 | 0 | 0 | - | - |
| Switch-associated protein 70           | SWP70_HUMAN | 69 kDa | 0.50±0.58 | 0 | 0 | - | - |
| Transaldolase                          | TALDO_HUMAN | 38 kDa | 0.50±0.58 | 0 | 0 | - | - |
| T-complex protein 1 subunit alpha      | TCPA_HUMAN  | 60 kDa | 0.50±0.58 | 0 | 0 | - | - |
| Tumor protein D54                      | TPD54_HUMAN | 22 kDa | 0.50±0.58 | 0 | 0 | - | - |
| Ubiquitin-conjugating enzyme E2 N      | UBE2N_HUMAN | 17 kDa | 0.50±1.00 | 0 | 0 | - | - |

\* Fold change is calculated by using spectra count of glycoprotein fraction divided by spectra count of flow-through fraction.

(a) Tropomyosin binds to lectins due to its hydrophobicity.
