# Supplementary material for: Glycoproteomic Analysis of the Secretome of Human Endothelial Cells
Source: PubMed Central journal article supplement — Mol Cell Proteomics. 2013 Jan 23;12(4):956–78. doi: 10.1074/mcp.M112.024018 (PMC3617342; doi:10.1074/mcp.m112.024018), 2013-01-23
Supplement: supp_M112.024018_mcp.M112.024018-6.pdf [file supp_M112.024018_mcp.M112.024018-6.pdf]

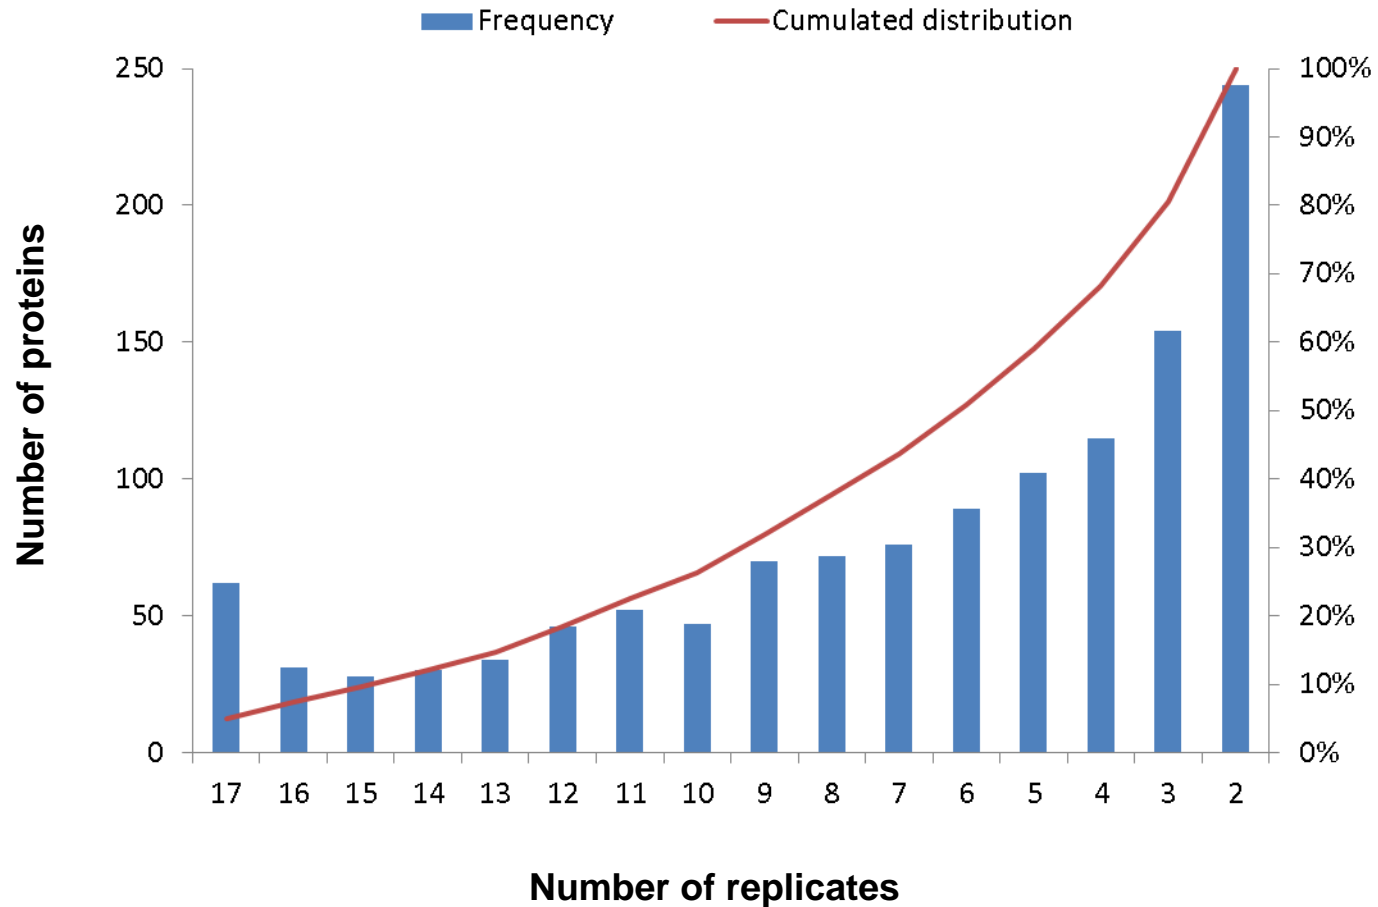

The frequency distribution of the number of proteins identified in N replicates. The cumulated distribution shows the percentage of proteins identified in  $\geq N$  replicates. (N= 17, 16, ... 2)
