# Supplementary material for: Glycoproteomic Analysis of the Secretome of Human Endothelial Cells
Source: PubMed Central journal article supplement — Mol Cell Proteomics. 2013 Jan 23;12(4):956–78. doi: 10.1074/mcp.M112.024018 (PMC3617342; doi:10.1074/mcp.m112.024018), 2013-01-23
Supplement: supp_M112.024018_mcp.M112.024018-7.pdf [file supp_M112.024018_mcp.M112.024018-7.pdf]

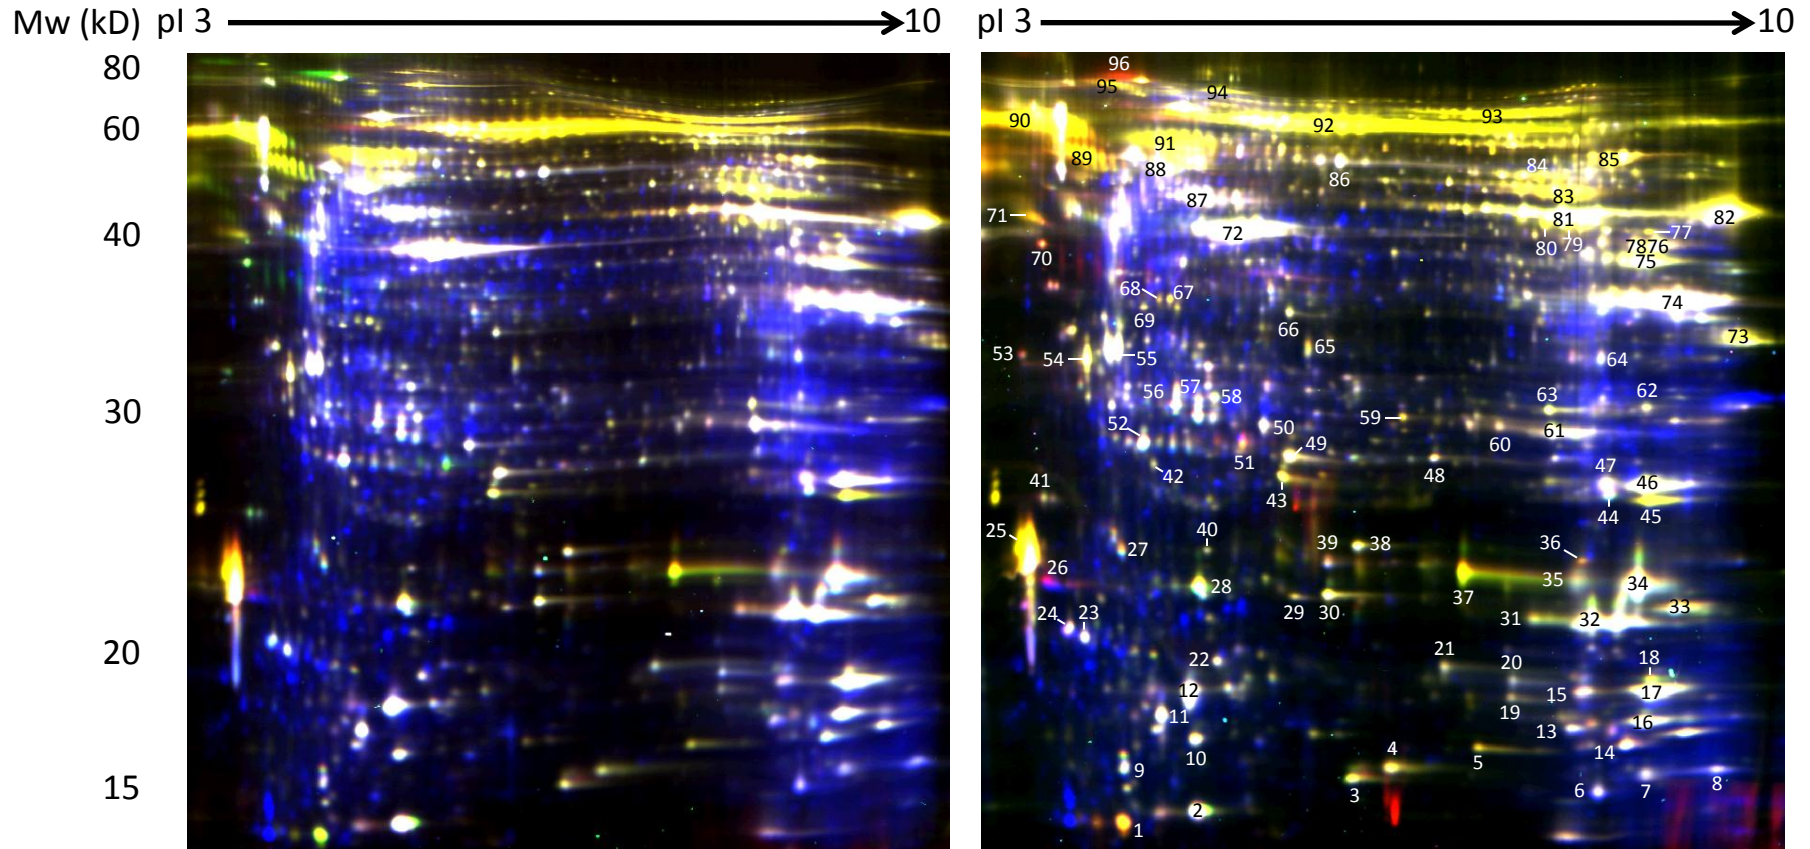

The representative 2D-DIGE images show a direct comparison between the cellular proteome of untreated HUVECs (blue), the secretome of untreated HUVECs (red in left panel, green in right panel), and the secretome of PMA-treated HUVEC (green in left panel, red in right panel). The most abundant common proteins were numbered, excised and identified by LC-MS/MS.
